# Supplementary material for: Two microbiota subtypes identified in irritable bowel syndrome with distinct responses to the low FODMAP diet
Source: PubMed Central journal article supplement (PMC9380505; doi:10.1136/gutjnl-2021-325177), 2021-11-22

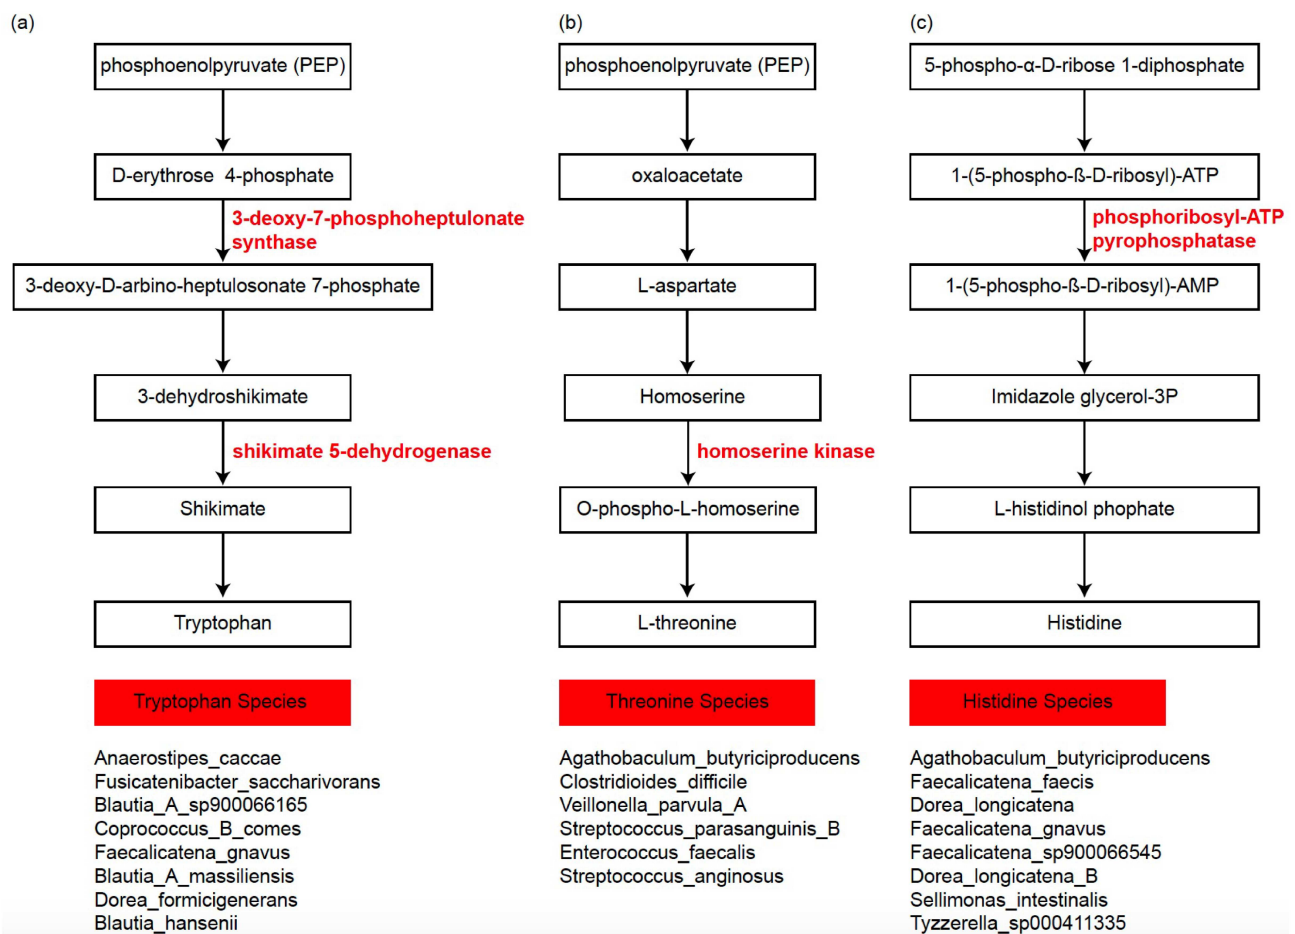

Supplement: gutjnl-2021-325177supp008.pdf [file gutjnl-2021-325177supp008.pdf]
