# Supplementary material for: Two microbiota subtypes identified in irritable bowel syndrome with distinct responses to the low FODMAP diet
Source: HighWire-hosted journal article supplement (doi:10.1136/gutjnl-2021-325177), 2021-11-22
Supplement: gutjnl-2021-325177supp009_data_supplement.pdf [file gutjnl-2021-325177supp009_data_supplement.pdf]

**Propionate species**

*Agathobaculum\_butyriciproducens*\*  
*Clostridium\_P\_perfringens*\*  
*Clostridium\_M\_clostridioforme*\*  
*Anaerostipes\_caccae*\*  
*Streptococcus\_anginosus*  
*Clostridioides\_difficile*\*  
*Dorea\_longicatena*  
*Faecalicatena\_sp900066545*  
*Dorea\_longicatena\_B*

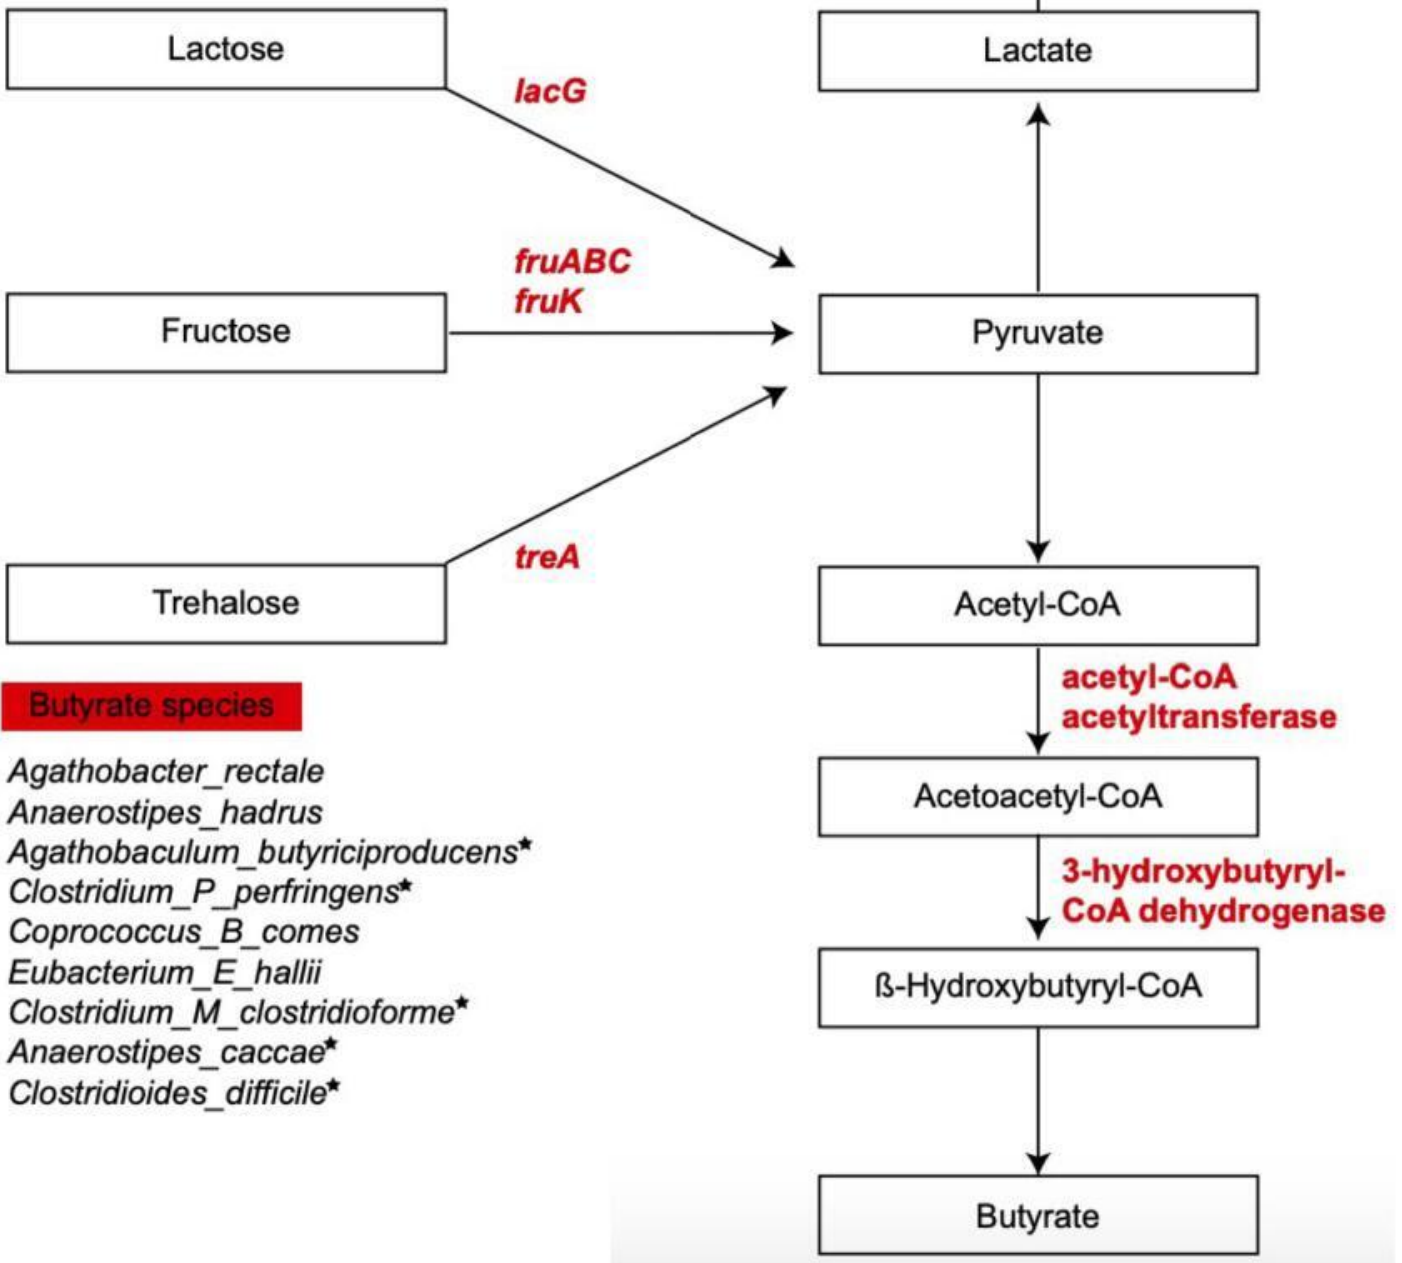**Butyrate species**

*Agathobacter\_rectale*  
*Anaerostipes\_hadrus*  
*Agathobaculum\_butyriciproducens*\*  
*Clostridium\_P\_perfringens*\*  
*Coprococcus\_B\_comes*  
*Eubacterium\_E\_hallii*  
*Clostridium\_M\_clostridioforme*\*  
*Anaerostipes\_caccae*\*  
*Clostridioides\_difficile*\*
