# Supplementary material for: Two microbiota subtypes identified in irritable bowel syndrome with distinct responses to the low FODMAP diet
Source: HighWire-hosted journal article supplement (doi:10.1136/gutjnl-2021-325177), 2021-11-22

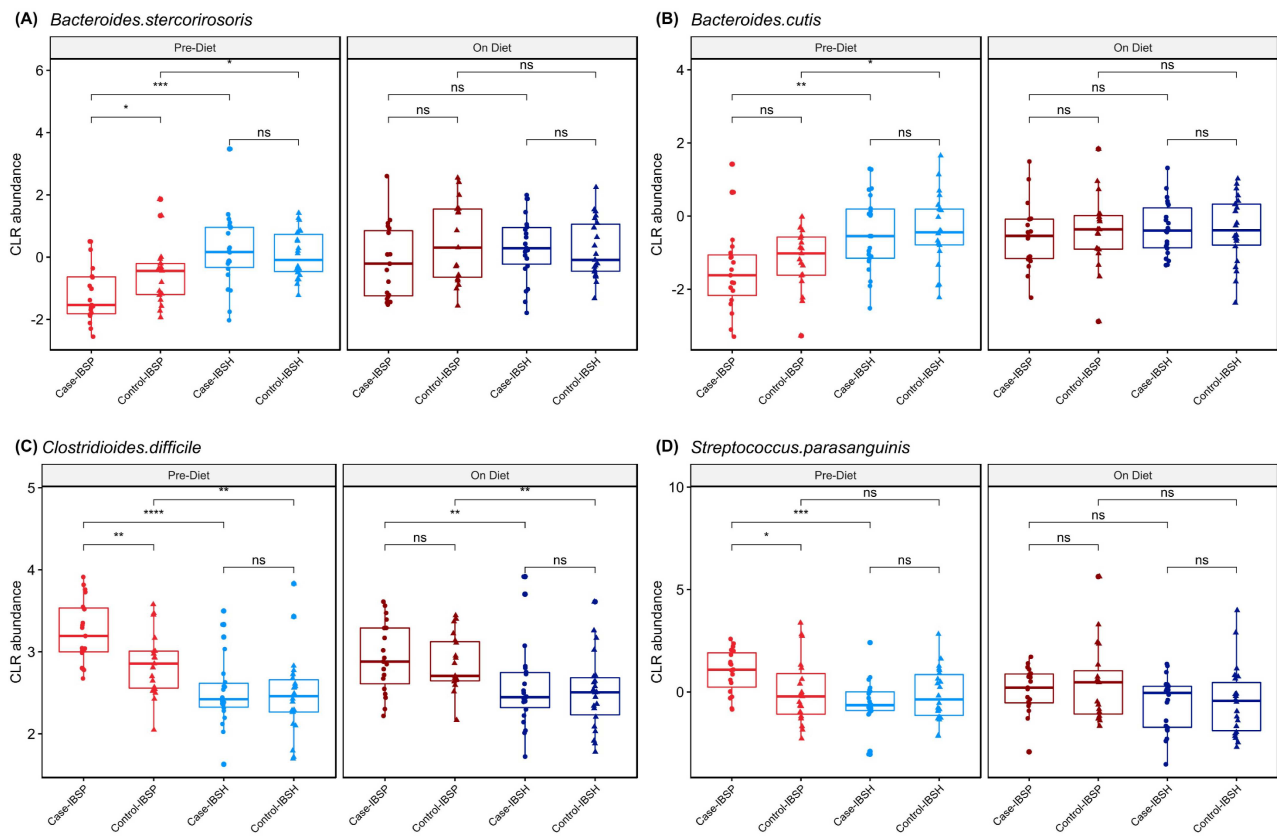

Supplement: gutjnl-2021-325177supp011_data_supplement.pdf [file gutjnl-2021-325177supp011_data_supplement.pdf]
