# Supplementary material for: Two microbiota subtypes identified in irritable bowel syndrome with distinct responses to the low FODMAP diet
Source: Gut. 2021 Nov 22;71(9):1821–30. doi: 10.1136/gutjnl-2021-325177 (PMC9380505; doi:10.1136/gutjnl-2021-325177)
Supplement: Supplementary data [file gutjnl-2021-325177supp015.xlsx]

## Sheet: Enriched_pathways
Feature	Group	P-value	Q-value	MetaCyc (annotations)
P4_PWY__superpathway_of_L_lysine__L_threonine_and_L_methionine_biosynthesis_I	IBS1	5.50103e-05	0.000379914	Amino Acid Biosynthesis
METSYN_PWY__L_homoserine_and_L_methionine_biosynthesis	IBS1	0.000154158	0.000702673	Amino Acid Biosynthesis
PWY_5347__superpathway_of_L_methionine_biosynthesis__transsulfuration_	IBS1	0.00019473	0.000766857	Amino Acid Biosynthesis
PWY0_1061__superpathway_of_L_alanine_biosynthesis	IBS1	9.72355e-05	0.00052347	Amino Acid Biosynthesis
DAPLYSINESYN_PWY__L_lysine_biosynthesis_I	IBS1	0.000192152	0.000766857	Amino Acid Biosynthesis
HOMOSER_METSYN_PWY__L_methionine_biosynthesis_I	IBS1	9.88183e-05	0.00052347	Amino Acid Biosynthesis
PWY0_781__aspartate_superpathway	IBS1	0.0054967	0.0107735	Amino Acid Biosynthesis
TRPSYN_PWY__L_tryptophan_biosynthesis	IBS1	1.97752e-05	0.000193797	Amino Acid Biosynthesis
PWY_6936__seleno_amino_acid_biosynthesis	IBS1	1.14841e-05	0.000160778	Amino Acid Biosynthesis
ARGSYNBSUB_PWY__L_arginine_biosynthesis_II__acetyl_cycle_	IBS1	7.48119e-05	0.000444337	Amino Acid Biosynthesis
PWY_4981__L_proline_biosynthesis_II__from_arginine_	IBS1	0.00247497	0.00551243	Amino Acid Biosynthesis
BRANCHED_CHAIN_AA_SYN_PWY__superpathway_of_branched_amino_acid_biosynthesis	IBS1	3.08266e-06	0.000100006	Amino Acid Biosynthesis
ILEUSYN_PWY__L_isoleucine_biosynthesis_I__from_threonine_	IBS1	4.08189e-06	0.000100006	Amino Acid Biosynthesis
VALSYN_PWY__L_valine_biosynthesis	IBS1	4.08189e-06	0.000100006	Amino Acid Biosynthesis
ARGSYN_PWY__L_arginine_biosynthesis_I__via_L_ornithine_	IBS1	0.000199539	0.000766857	Amino Acid Biosynthesis
COMPLETE_ARO_PWY__superpathway_of_aromatic_amino_acid_biosynthesis	IBS1	6.26302e-05	0.000395985	Amino Acid Biosynthesis
PWY_5103__L_isoleucine_biosynthesis_III	IBS1	5.01702e-06	0.000109259	Amino Acid Biosynthesis
PWY_7400__L_arginine_biosynthesis_IV__archaebacteria_	IBS1	0.000198204	0.000766857	Amino Acid Biosynthesis
SER_GLYSYN_PWY__superpathway_of_L_serine_and_glycine_biosynthesis_I	IBS1	7.19204e-05	0.000440512	Amino Acid Biosynthesis
PWY_5097__L_lysine_biosynthesis_VI	IBS1	0.000265856	0.000914171	Amino Acid Biosynthesis
PWY_724__superpathway_of_L_lysine__L_threonine_and_L_methionine_biosynthesis_II	IBS1	0.000125851	0.000601627	Amino Acid Biosynthesis
HSERMETANA_PWY__L_methionine_biosynthesis_III	IBS1	0.000461712	0.00139224	Amino Acid Biosynthesis
PWY_3001__superpathway_of_L_isoleucine_biosynthesis_I	IBS1	3.57497e-06	0.000100006	Amino Acid Biosynthesis
THRESYN_PWY__superpathway_of_L_threonine_biosynthesis	IBS1	1.53853e-05	0.000177059	Amino Acid Biosynthesis
PWY_2942__L_lysine_biosynthesis_III	IBS1	0.00253315	0.00557862	Amino Acid Biosynthesis
HISTSYN_PWY__L_histidine_biosynthesis	IBS1	0.00483093	0.00957943	Amino Acid Biosynthesis
GLUTORN_PWY__L_ornithine_biosynthesis	IBS1	1.04803e-05	0.000158142	Amino Acid Biosynthesis
TRNA_CHARGING_PWY__tRNA_charging	IBS1	0.017831	0.0296176	Aminoacyl-tRNA Charging
ARO_PWY__chorismate_biosynthesis_I	IBS1	0.000244379	0.000870878	Aromatic Compound Biosynthesis
PWY_6163__chorismate_biosynthesis_from_3_dehydroquinate	IBS1	0.00103756	0.0026072	Aromatic Compound Biosynthesis
PWY_1861__formaldehyde_assimilation_II__RuMP_Cycle_	IBS1	0.016171	0.0273234	C1 Compound Utilization and Assimilation
PWY_622__starch_biosynthesis	IBS1	9.95195e-07	0.000100006	Carbohydrate Biosynthesis
GLYCOGENSYNTH_PWY__glycogen_biosynthesis_I__from_ADP_D_Glucose_	IBS1	2.11298e-06	0.000100006	Carbohydrate Biosynthesis
PWY_7328__superpathway_of_UDP_glucose_derived_O_antigen_building_blocks_biosynthesis	IBS1	5.64945e-05	0.000379914	Carbohydrate Biosynthesis
GLUCONEO_PWY__gluconeogenesis_I	IBS1	0.000186337	0.000766857	Carbohydrate Biosynthesis
UDPNAGSYN_PWY__UDP_N_acetyl_D_glucosamine_biosynthesis_I	IBS1	0.00146042	0.00340765	Carbohydrate Biosynthesis
OANTIGEN_PWY__O_antigen_building_blocks_biosynthesis__E__coli_	IBS1	0.000103394	0.000533298	Carbohydrate Biosynthesis
CALVIN_PWY__Calvin_Benson_Bassham_cycle	IBS1	4.89103e-05	0.000368708	Carbohydrate Biosynthesis
GLYCOCAT_PWY__glycogen_degradation_I__bacterial_	IBS1	2.539e-05	0.000236973	Carbohydrate Degradation
P124_PWY__Bifidobacterium_shunt	IBS1	4.38268e-05	0.000343602	Carbohydrate Degradation
GLUCOSE1PMETAB_PWY__glucose_and_glucose_1_phosphate_degradation	IBS1	1.0489e-05	0.000158142	Carbohydrate Degradation
PWY_2723__trehalose_degradation_V	IBS1	1.49783e-05	0.000177059	Carbohydrate Degradation
PWY66_422__D_galactose_degradation_V__Leloir_pathway_	IBS1	1.80948e-05	0.000186662	Carbohydrate Degradation
LACTOSECAT_PWY__lactose_and_galactose_degradation_I	IBS1	5.81501e-05	0.000379914	Carbohydrate Degradation
PWY_6527__stachyose_degradation	IBS1	3.75111e-05	0.000306341	Carbohydrate Degradation
PWY_5384__sucrose_degradation_IV__sucrose_phosphorylase_	IBS1	0.000915717	0.00242541	Carbohydrate Degradation
PWY_6317__galactose_degradation_I__Leloir_pathway_	IBS1	0.000996844	0.00257081	Carbohydrate Degradation
PWY_6737__starch_degradation_V	IBS1	0.00854667	0.0153683	Carbohydrate Degradation
PWY_6471__peptidoglycan_biosynthesis_IV__Enterococcus_faecium_	IBS1	0.00297101	0.00626149	Cell Structure Biosynthesis
PEPTIDOGLYCANSYN_PWY__peptidoglycan_biosynthesis_I__meso_diaminopimelate_containing_	IBS1	0.00126475	0.00302305	Cell Structure Biosynthesis
PWY0_1586__peptidoglycan_maturation__meso_diaminopimelate_containing_	IBS1	0.0221599	0.0364986	Cell Structure Biosynthesis
PWY_6385__peptidoglycan_biosynthesis_III__mycobacteria_	IBS1	0.00483859	0.00957943	Cell Structure Biosynthesis
PWY_6386__UDP_N_acetylmuramoyl_pentapeptide_biosynthesis_II__lysine_containing_	IBS1	0.000220745	0.000816341	Cell Structure Biosynthesis
PWY_6387__UDP_N_acetylmuramoyl_pentapeptide_biosynthesis_I__meso_diaminopimelate_containing_	IBS1	0.00048596	0.00142734	Cell Structure Biosynthesis
COA_PWY__coenzyme_A_biosynthesis_I	IBS1	0.000384686	0.0011968	Cofactor, Carrier, and Vitamin Biosynthesis
MET_SAM_PWY__superpathway_of_S_adenosyl_L_methionine_biosynthesis	IBS1	0.000157812	0.000702981	Cofactor, Carrier, and Vitamin Biosynthesis
PWY_6151__S_adenosyl_L_methionine_cycle_I	IBS1	0.000314407	0.00106248	Cofactor, Carrier, and Vitamin Biosynthesis
PWY_7357__thiamin_formation_from_pyrithiamine_and_oxythiamine__yeast_	IBS1	1.62605e-05	0.000177059	Cofactor, Carrier, and Vitamin Biosynthesis
PYRIDNUCSAL_PWY__NAD_salvage_pathway_I	IBS1	0.0230012	0.0375686	Cofactor, Carrier, and Vitamin Biosynthesis
COBALSYN_PWY__adenosylcobalamin_salvage_from_cobinamide_I	IBS1	3.26002e-05	0.000290439	Cofactor, Carrier, and Vitamin Biosynthesis
COA_PWY_1__coenzyme_A_biosynthesis_II__mammalian_	IBS1	0.000205018	0.000772761	Cofactor, Carrier, and Vitamin Biosynthesis
PWY_4041___gamma__glutamyl_cycle	IBS1	0.0141144	0.0244817	Cofactor, Carrier, and Vitamin Biosynthesis
PWY_6891__thiazole_biosynthesis_II__Bacillus_	IBS1	0.0175618	0.0294197	Cofactor, Carrier, and Vitamin Biosynthesis
THISYNARA_PWY__superpathway_of_thiamin_diphosphate_biosynthesis_III__eukaryotes_	IBS1	0.00415161	0.00851023	Cofactor, Carrier, and Vitamin Biosynthesis
PWY_6892__thiazole_biosynthesis_I__E__coli_	IBS1	0.0120318	0.0210557	Cofactor, Carrier, and Vitamin Biosynthesis
1CMET2_PWY__N10_formyl_tetrahydrofolate_biosynthesis	IBS1	0.00476106	0.00957943	Cofactor, Carrier, and Vitamin Biosynthesis
PANTO_PWY__phosphopantothenate_biosynthesis_I	IBS1	0.00927279	0.0163736	Cofactor, Carrier, and Vitamin Biosynthesis
PANTOSYN_PWY__pantothenate_and_coenzyme_A_biosynthesis_I	IBS1	0.00852857	0.0153683	Cofactor, Carrier, and Vitamin Biosynthesis
PWY_3841__folate_transformations_II	IBS1	0.0084393	0.0153683	Cofactor, Carrier, and Vitamin Biosynthesis
PWY_5667__CDP_diacylglycerol_biosynthesis_I	IBS1	0.00114486	0.00280491	Fatty Acid and Lipid Biosynthesis
PWY0_1319__CDP_diacylglycerol_biosynthesis_II	IBS1	0.00114486	0.00280491	Fatty Acid and Lipid Biosynthesis
PWY_5100__pyruvate_fermentation_to_acetate_and_lactate_II	IBS1	1.88938e-06	0.000100006	Fermentation
PWY_7111__pyruvate_fermentation_to_isobutanol__engineered_	IBS1	3.57966e-06	0.000100006	Fermentation
PWY_5676__acetyl_CoA_fermentation_to_butanoate_II	IBS1	0.0236911	0.0383757	Fermentation
ANAEROFRUCAT_PWY__homolactic_fermentation	IBS1	0.000225065	0.000816901	Fermentation
FERMENTATION_PWY__mixed_acid_fermentation	IBS1	0.0252374	0.0405453	Fermentation
PWY_5913__TCA_cycle_VI__obligate_autotrophs_	IBS1	0.000124838	0.000601627	Generation of Precursor Metabolites and Energy
NONOXIPENT_PWY__pentose_phosphate_pathway__non_oxidative_branch_	IBS1	1.01046e-05	0.000158142	Generation of Precursor Metabolites and Energy
PWY66_400__glycolysis_VI__metazoan_	IBS1	0.000334849	0.00107591	Generation of Precursor Metabolites and Energy
PWY_1042__glycolysis_IV__plant_cytosol_	IBS1	0.000561855	0.00155104	Generation of Precursor Metabolites and Energy
GLYCOLYSIS__glycolysis_I__from_glucose_6_phosphate_	IBS1	0.000893324	0.00239851	Generation of Precursor Metabolites and Energy
ANAGLYCOLYSIS_PWY__glycolysis_III__from_glucose_	IBS1	0.00075859	0.00206505	Generation of Precursor Metabolites and Energy
PWY_5484__glycolysis_II__from_fructose_6_phosphate_	IBS1	0.00693721	0.01305	Generation of Precursor Metabolites and Energy
PWY_7117__C4_photosynthetic_carbon_assimilation_cycle__PEPCK_type	IBS1	0.000123458	0.000601627	Generation of Precursor Metabolites and Energy
PWY_241__C4_photosynthetic_carbon_assimilation_cycle__NADP_ME_type	IBS1	0.000163119	0.000707653	Generation of Precursor Metabolites and Energy
PWY_7115__C4_photosynthetic_carbon_assimilation_cycle__NAD_ME_type	IBS1	0.00101155	0.00257486	Generation of Precursor Metabolites and Energy
METH_ACETATE_PWY__methanogenesis_from_acetate	IBS1	3.56905e-05	0.000304145	Generation of Precursor Metabolites and Energy
PPGPPMET_PWY__ppGpp_biosynthesis	IBS1	0.00118181	0.00285968	Metabolic Regulator Biosynthesis
PWY_6353__purine_nucleotides_degradation_II__aerobic_	IBS1	0.000978913	0.00255823	Nucleoside and Nucleotide Degradation
PWY0_1296__purine_ribonucleosides_degradation	IBS1	0.00243588	0.00548772	Nucleoside and Nucleotide Degradation
SALVADEHYPOX_PWY__adenosine_nucleotides_degradation_II	IBS1	0.001609	0.00371016	Nucleoside and Nucleotide Degradation
PWY_6608__guanosine_nucleotides_degradation_III	IBS1	0.00664315	0.0126413	Nucleoside and Nucleotide Degradation
PWY_6606__guanosine_nucleotides_degradation_II	IBS1	0.00141098	0.00333195	Nucleoside and Nucleotide Degradation
P164_PWY__purine_nucleobases_degradation_I__anaerobic_	IBS1	0.015045	0.0256419	Nucleoside and Nucleotide Degradation
PWY_7196__superpathway_of_pyrimidine_ribonucleosides_salvage	IBS1	0.0264505	0.0421488	Nucleoside and Nucleotide Degradation
PWY_6122__5_aminoimidazole_ribonucleotide_biosynthesis_II	IBS1	0.000549129	0.00153756	Nucleoside and Nucleotide Degradation
PWY_6277__superpathway_of_5_aminoimidazole_ribonucleotide_biosynthesis	IBS1	0.000549129	0.00153756	Nucleoside and Nucleotide Degradation
PWY_5686__UMP_biosynthesis	IBS1	0.00025477	0.000891694	Nucleoside and Nucleotide Degradation
PWY_7221__guanosine_ribonucleotides_de_novo_biosynthesis	IBS1	0.00200384	0.00456688	Nucleoside and Nucleotide Degradation
PWY_6121__5_aminoimidazole_ribonucleotide_biosynthesis_I	IBS1	0.00265872	0.0057901	Nucleoside and Nucleotide Degradation
PWY_6126__superpathway_of_adenosine_nucleotides_de_novo_biosynthesis_II	IBS1	0.00917431	0.016347	Nucleoside and Nucleotide Degradation
PWY_7229__superpathway_of_adenosine_nucleotides_de_novo_biosynthesis_I	IBS1	0.00617186	0.0119557	Nucleoside and Nucleotide Degradation
PWY_7219__adenosine_ribonucleotides_de_novo_biosynthesis	IBS1	0.0146742	0.0252293	Nucleoside and Nucleotide Degradation
NONMEVIPP_PWY__methylerythritol_phosphate_pathway_I	IBS1	5.42205e-05	0.000379914	Secondary Metabolite Degradation
PWY_7237__myo___chiro__and_scillo_inositol_degradation	IBS1	0.000328133	0.0010719	Secondary Metabolite Degradation
PWY_6270__isoprene_biosynthesis_I	IBS1	1.00684e-05	0.000158142	Terpenoid Biosynthesis
PWY_7560__methylerythritol_phosphate_pathway_II	IBS1	1.53213e-05	0.000177059	Terpenoid Biosynthesis
PWY_5188__tetrapyrrole_biosynthesis_I__from_glutamate_	IBS1	0.000373636	0.00118117	Tetrapyrrole Biosynthesis
PWY_4242__pantothenate_and_coenzyme_A_biosynthesis_III	IBS1	9.50124e-05	0.00052347
PWY_7199__pyrimidine_deoxyribonucleosides_salvage	IBS2	0.00808486	0.0149494
THISYN_PWY__superpathway_of_thiamin_diphosphate_biosynthesis_I	IBS2	0.00340786	0.00710574
PWY_5154__L_arginine_biosynthesis_III__via_N_acetyl_L_citrulline_	IBS2	0.0309239	0.0488797
PWY_1269__CMP_3_deoxy_D_manno_octulosonate_biosynthesis_I	IBS2	0.00416827	0.00851023
PWY_6147__6_hydroxymethyl_dihydropterin_diphosphate_biosynthesis_I	IBS2	0.00699107	0.01305
PWY_7539__6_hydroxymethyl_dihydropterin_diphosphate_biosynthesis_III__Chlamydia_	IBS2	0.00622183	0.0119557
ARGININE_SYN4_PWY__L_ornithine_de_novo__biosynthesis	IBS2	0.00274914	0.00592123
PWY_5030__L_histidine_degradation_III	IBS2	0.00280122	0.00596782
PWY_7663__gondoate_biosynthesis__anaerobic_	IBS2	0.000542992	0.00153756
HISDEG_PWY__L_histidine_degradation_I	IBS2	0.00044133	0.00135157
PWY_5973__cis_vaccenate_biosynthesis	IBS2	0.000166082	0.000707653
CITRULBIO_PWY__L_citrulline_biosynthesis	IBS2	0.000146239	0.00068245
PWY_4984__urea_cycle	IBS2	7.70847e-05	0.000444371
