# Supplementary figures and images for: Two microbiota subtypes identified in irritable bowel syndrome with distinct responses to the low FODMAP diet
Source: HighWire-hosted journal article supplement (doi:10.1136/gutjnl-2021-325177), 2021-11-22

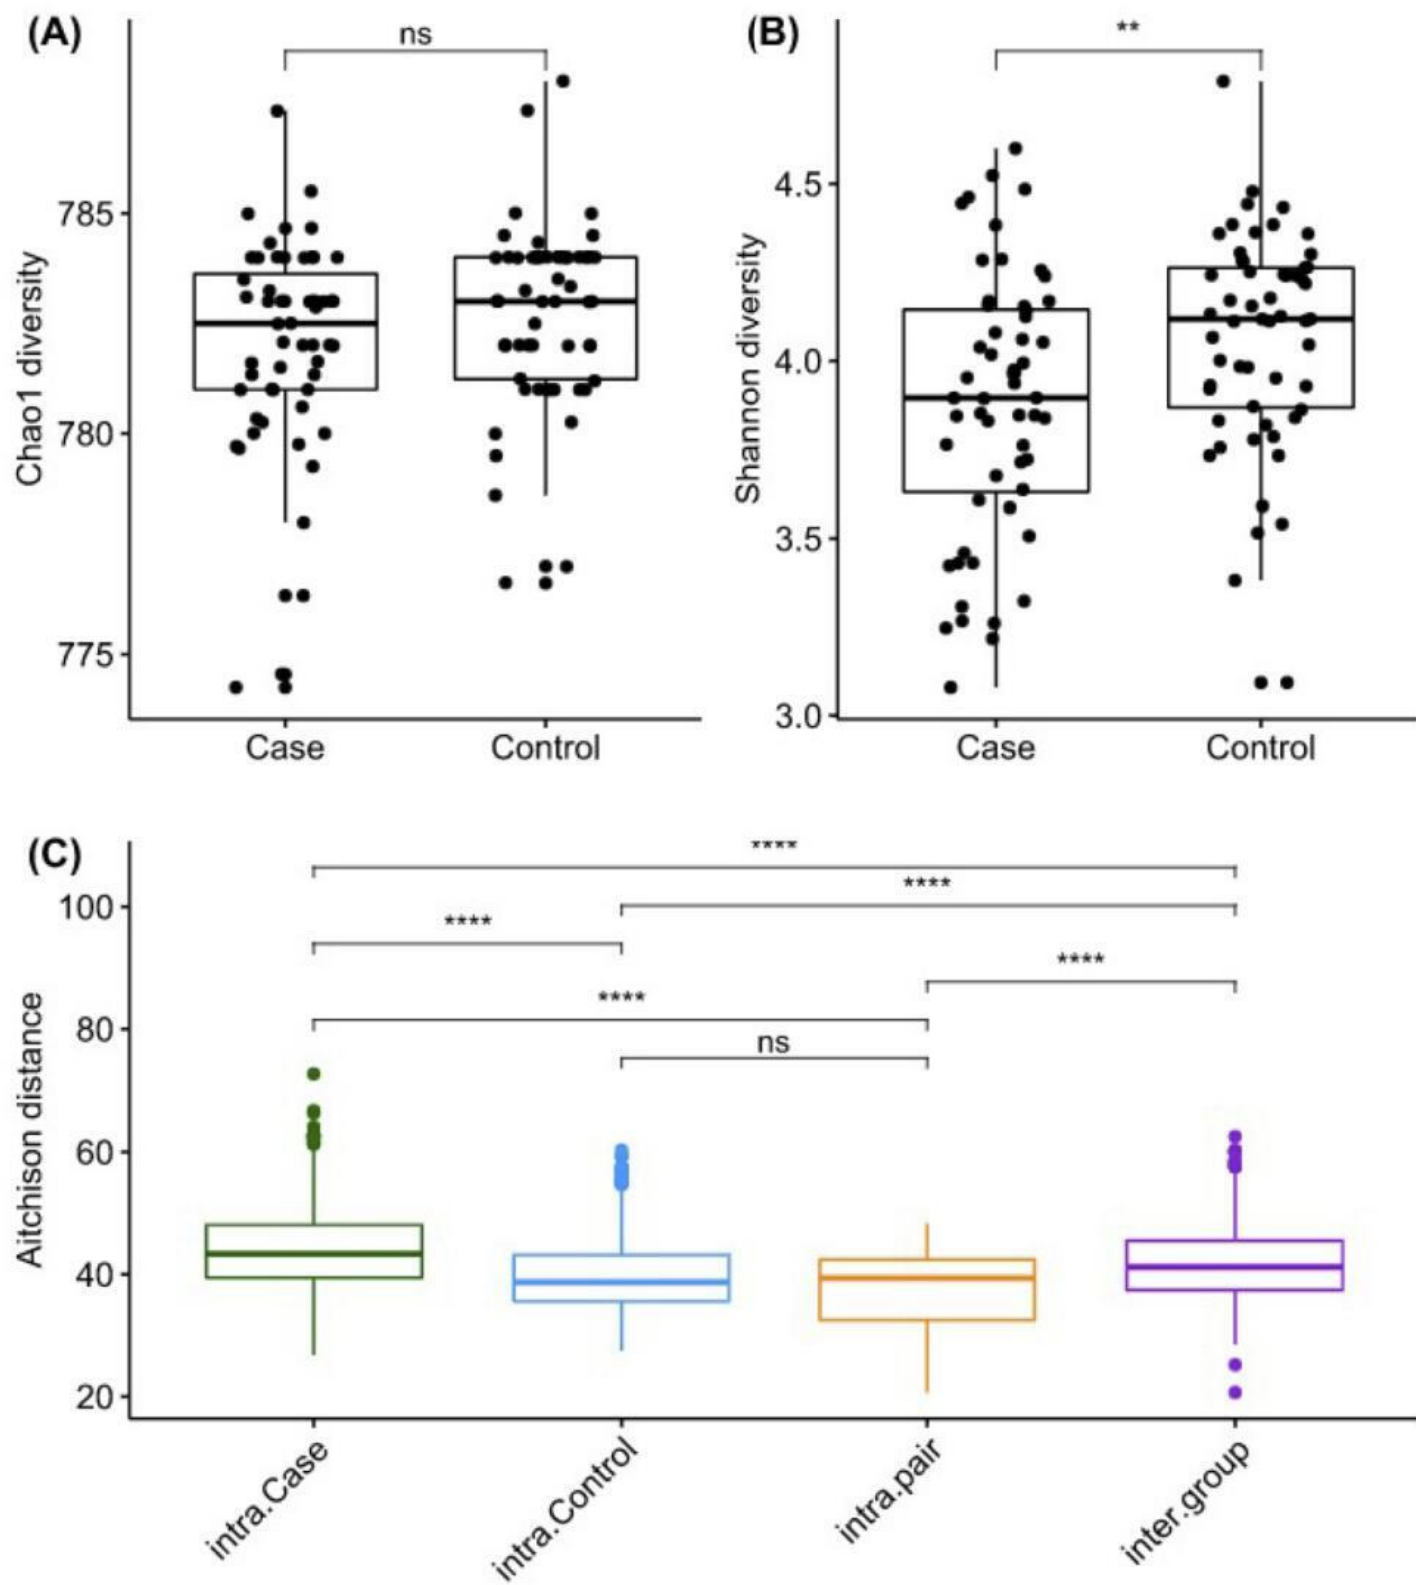

Supplement: gutjnl-2021-325177supp002_data_supplement.pdf [file gutjnl-2021-325177supp002_data_supplement.pdf]

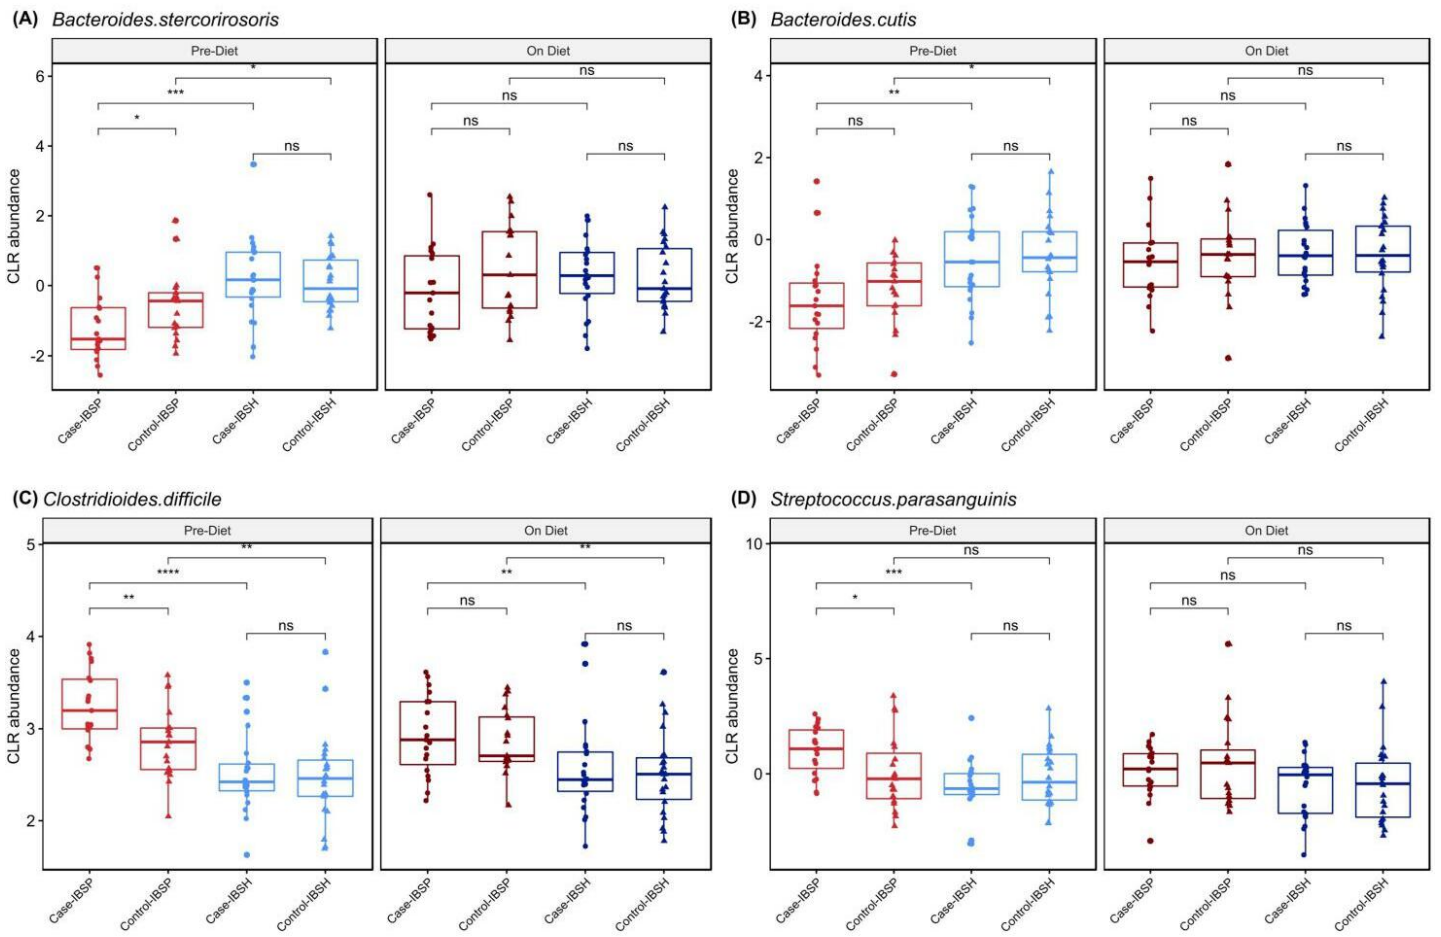

Supplement: gutjnl-2021-325177supp011_data_supplement.pdf [file gutjnl-2021-325177supp011_data_supplement.pdf]

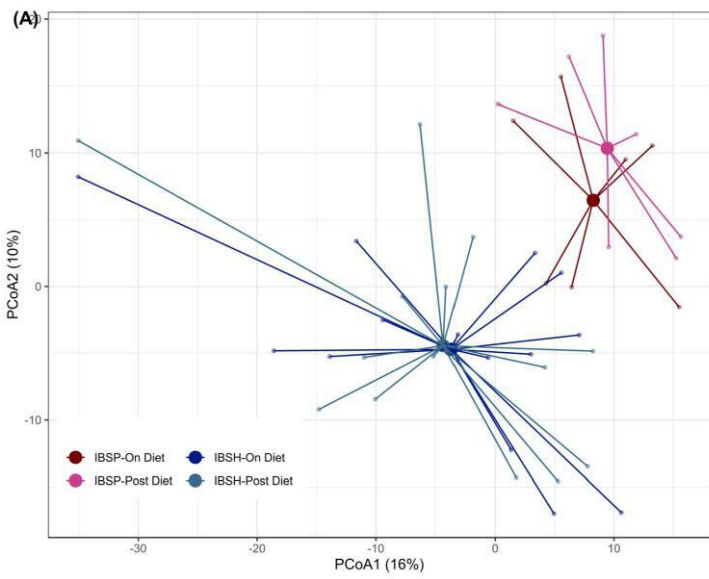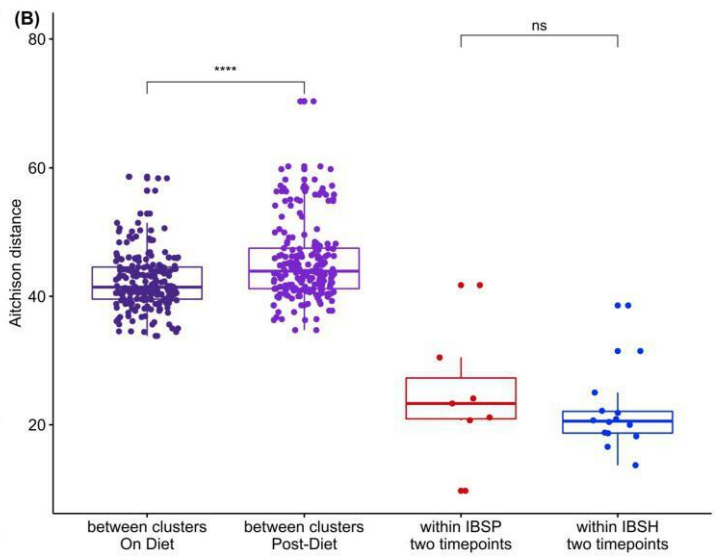

Supplement: gutjnl-2021-325177supp012_data_supplement.pdf [file gutjnl-2021-325177supp012_data_supplement.pdf]

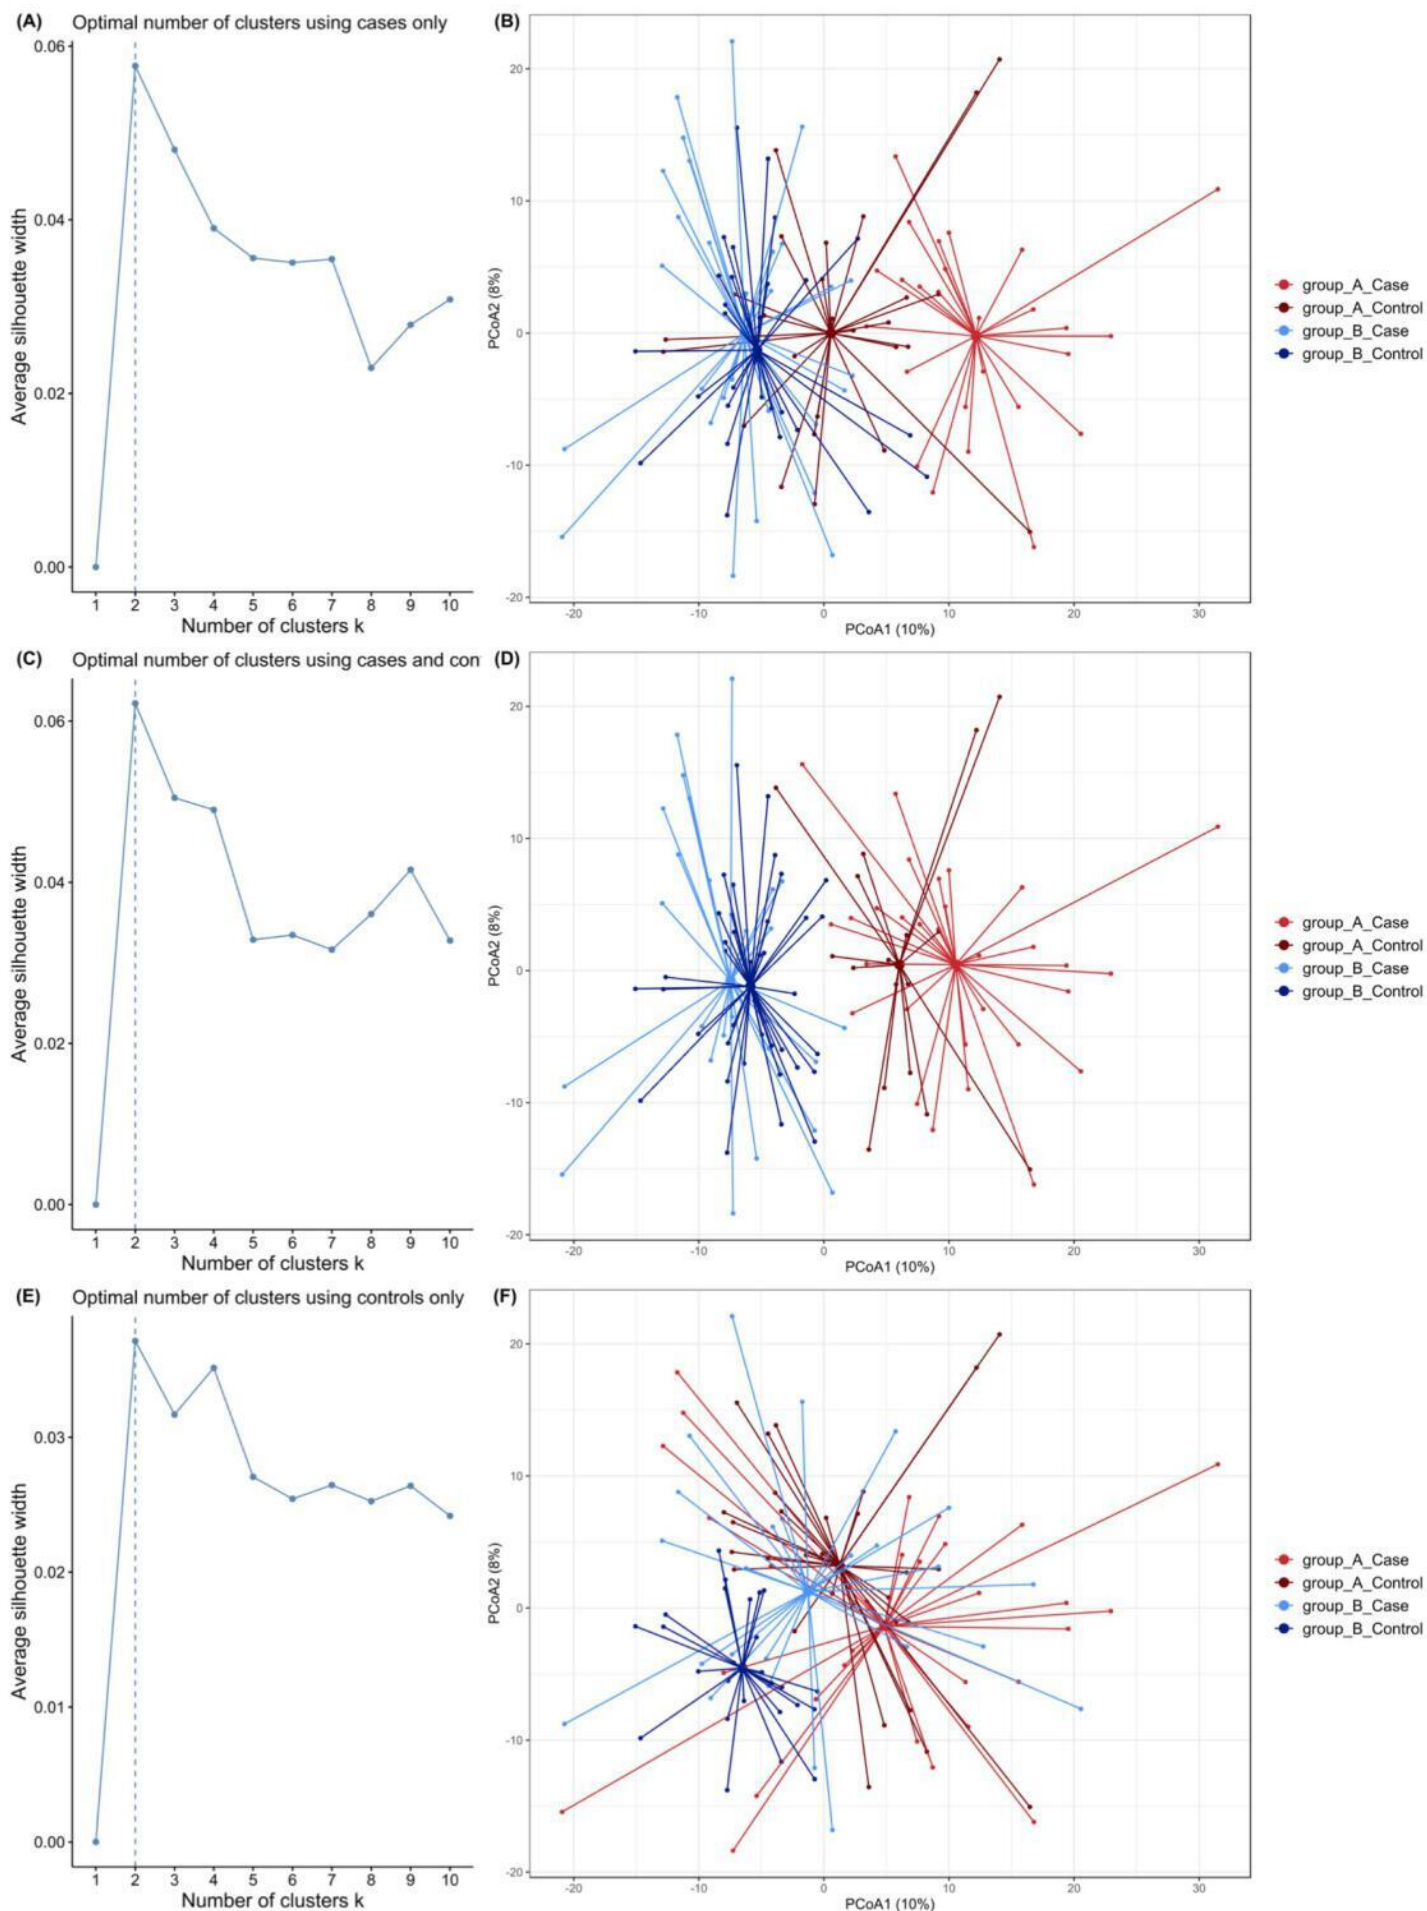

Supplement: gutjnl-2021-325177supp003_data_supplement.pdf [file gutjnl-2021-325177supp003_data_supplement.pdf]

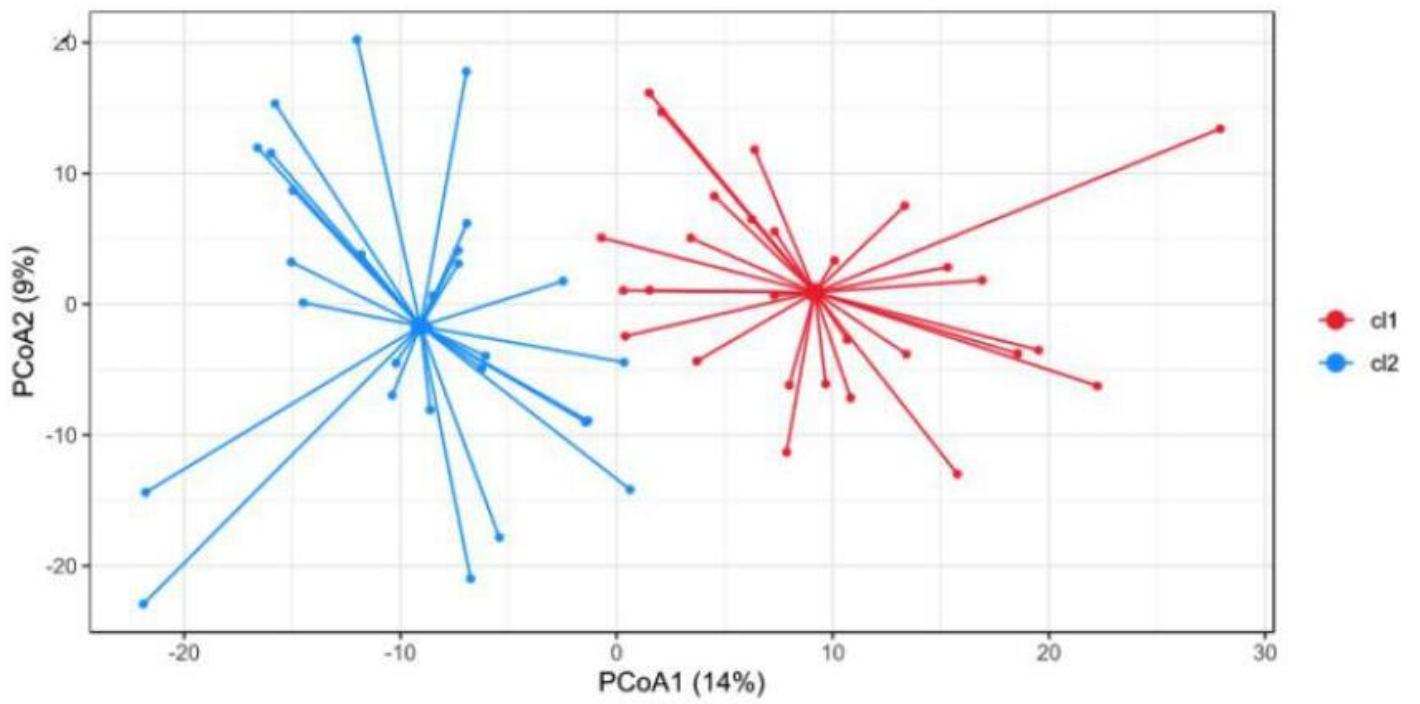

Supplement: gutjnl-2021-325177supp004_data_supplement.pdf [file gutjnl-2021-325177supp004_data_supplement.pdf]

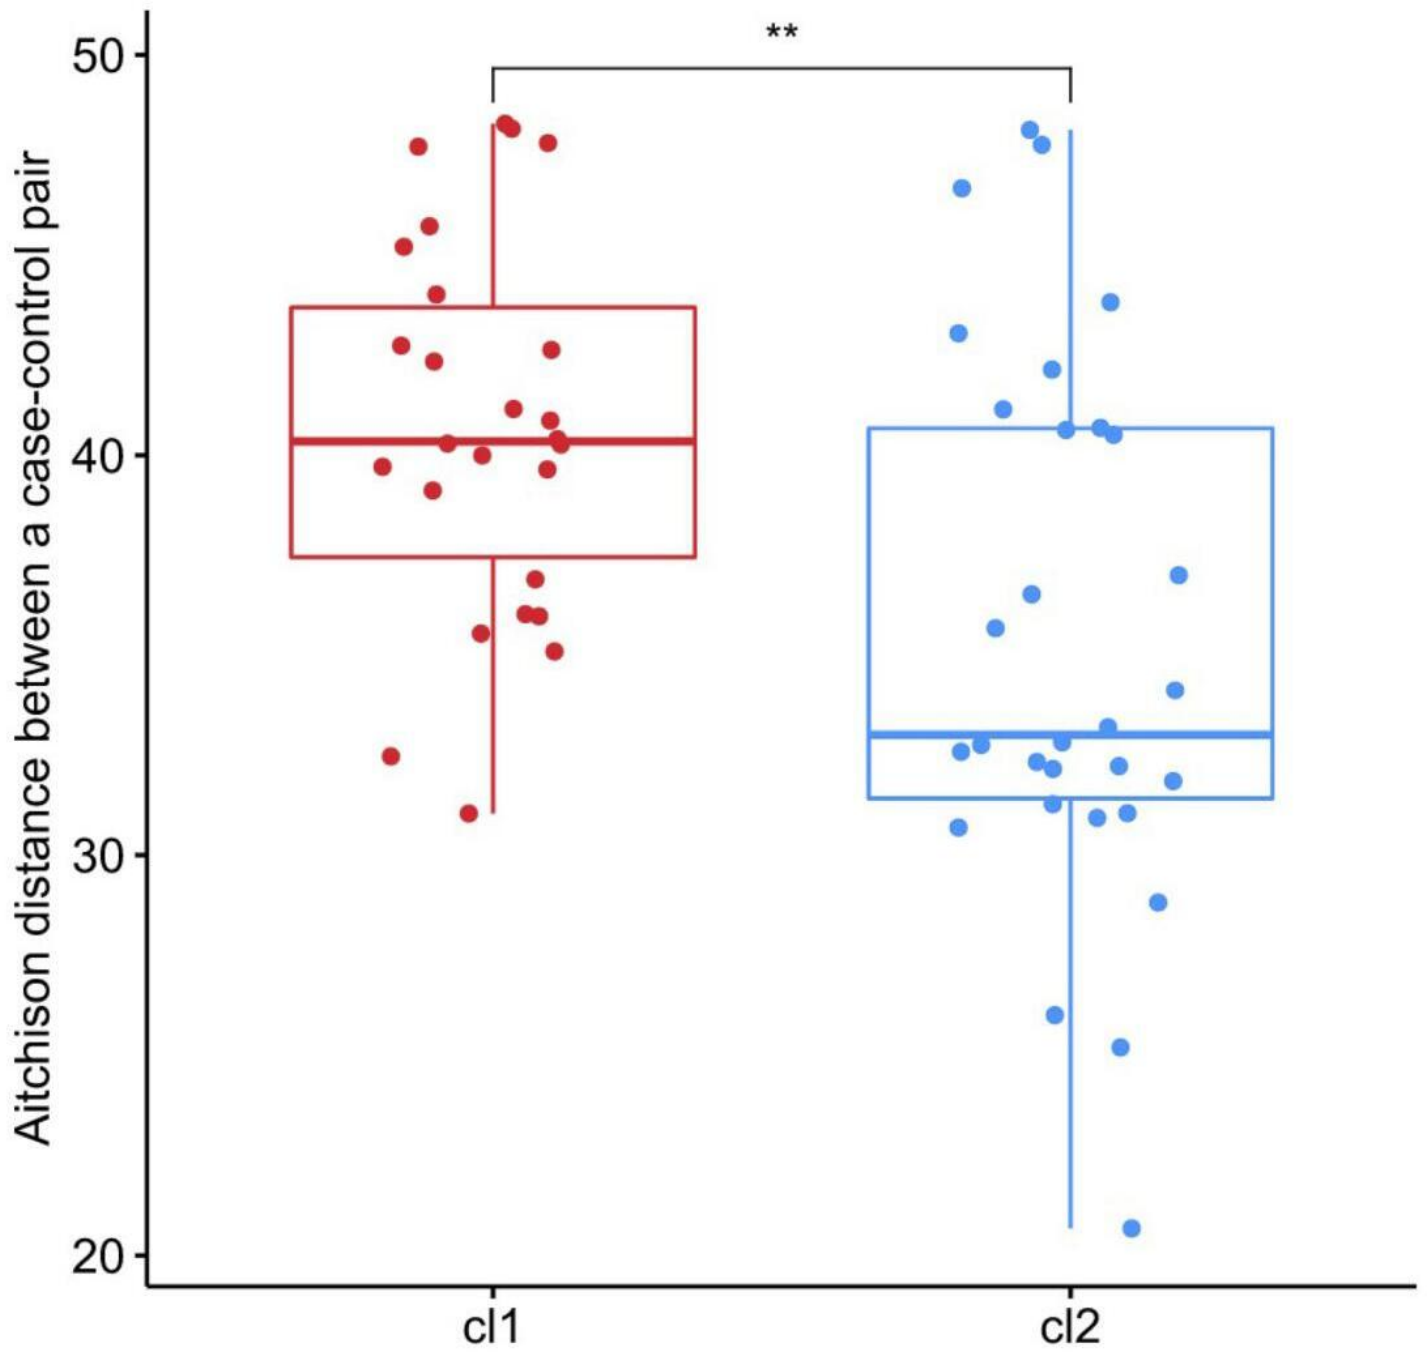

Supplement: gutjnl-2021-325177supp005_data_supplement.pdf [file gutjnl-2021-325177supp005_data_supplement.pdf]

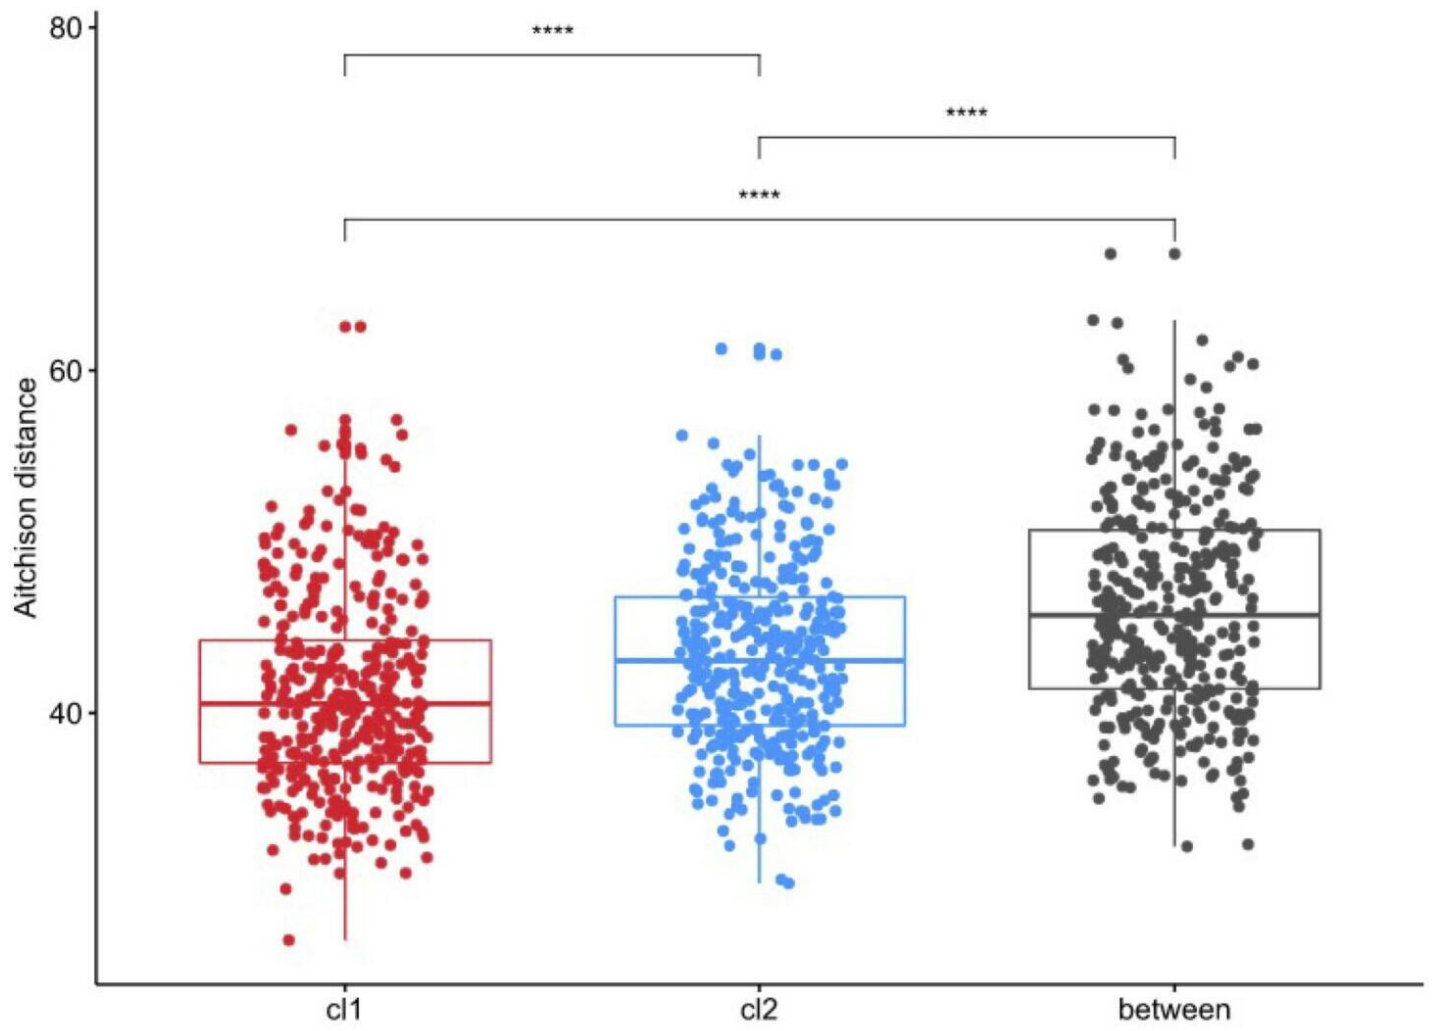

Supplement: gutjnl-2021-325177supp006_data_supplement.pdf [file gutjnl-2021-325177supp006_data_supplement.pdf]

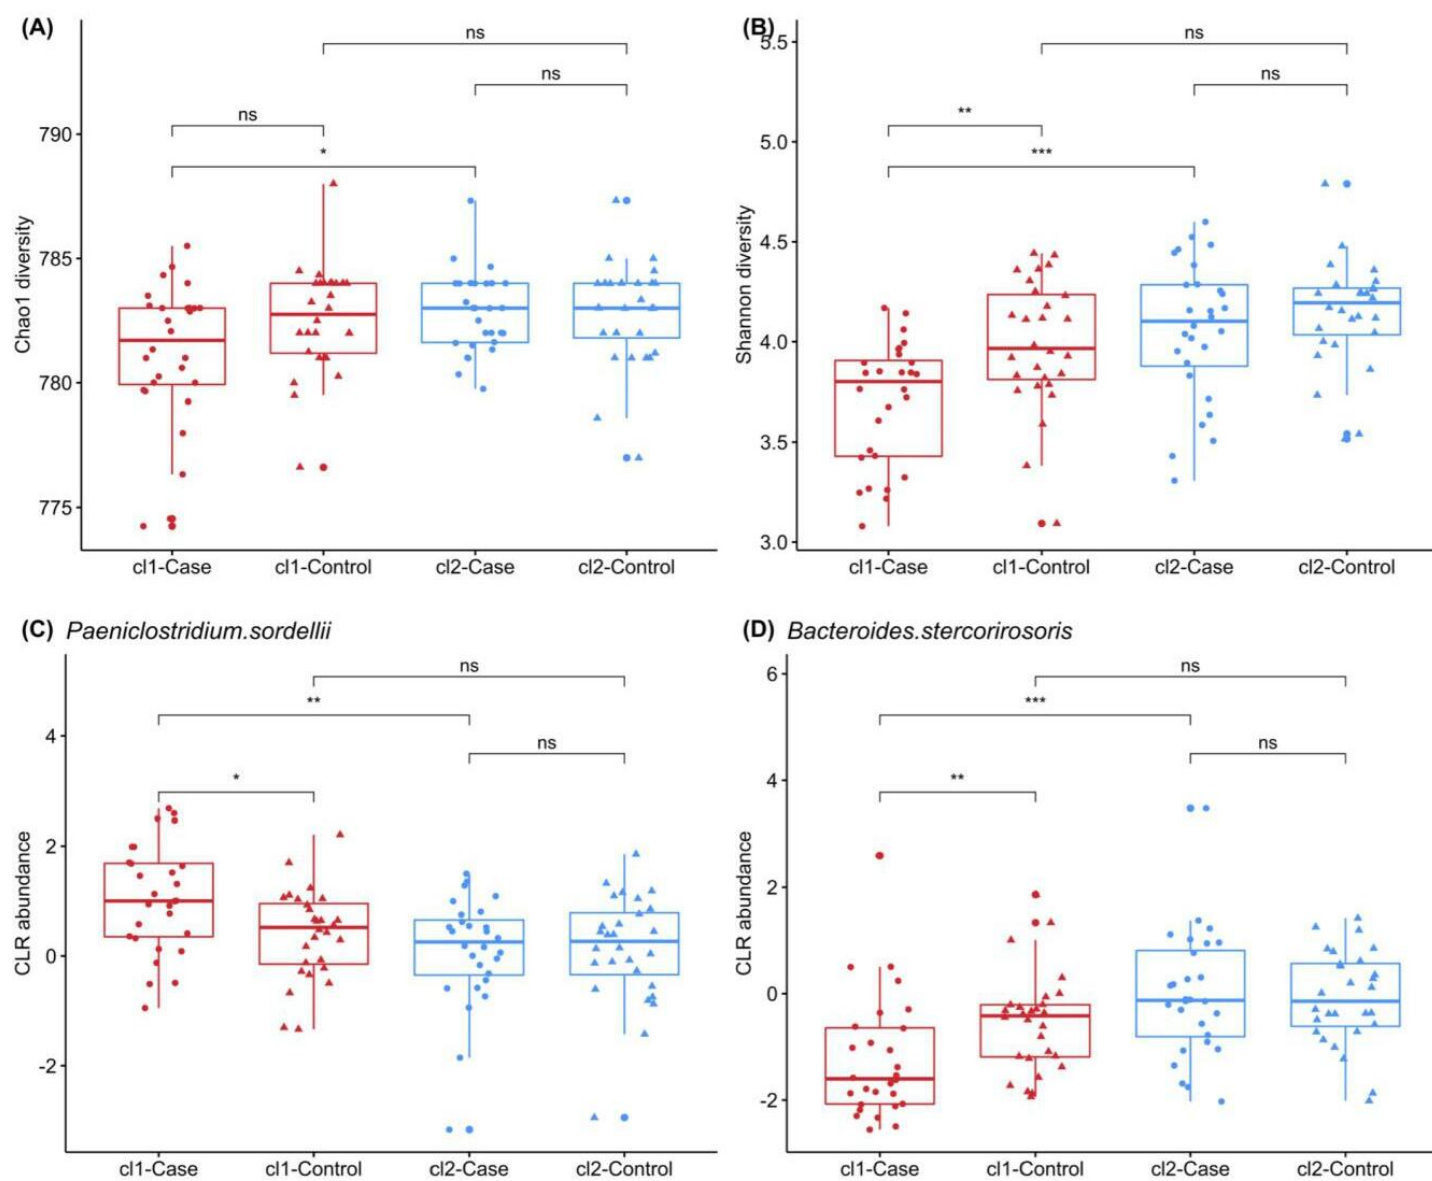

Supplement: gutjnl-2021-325177supp007_data_supplement.pdf [file gutjnl-2021-325177supp007_data_supplement.pdf]

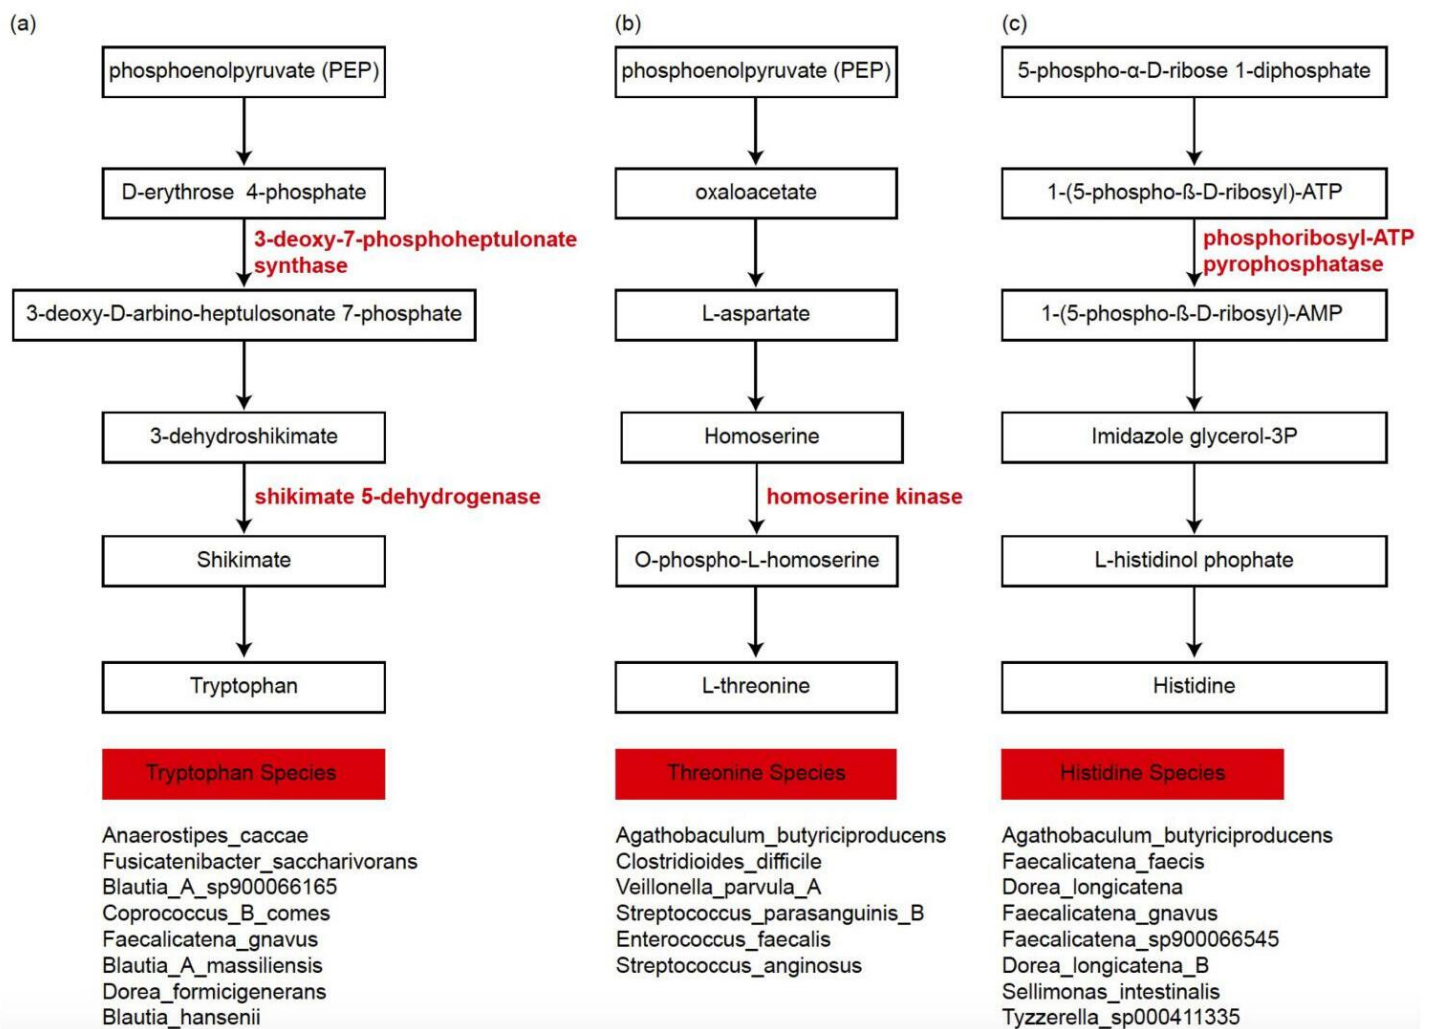

Supplement: gutjnl-2021-325177supp008_data_supplement.pdf [file gutjnl-2021-325177supp008_data_supplement.pdf]

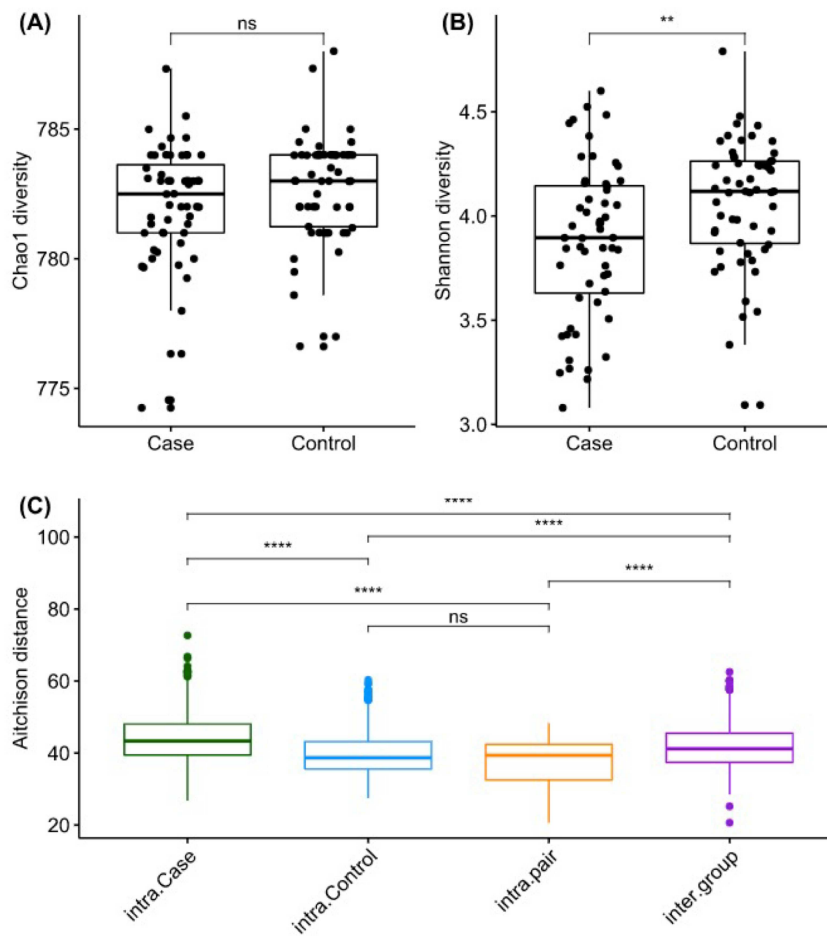

Supplement: gutjnl-2021-325177supp002_data_supplement.pdf [file gutjnl-2021-325177supp002_data_supplement.pdf]

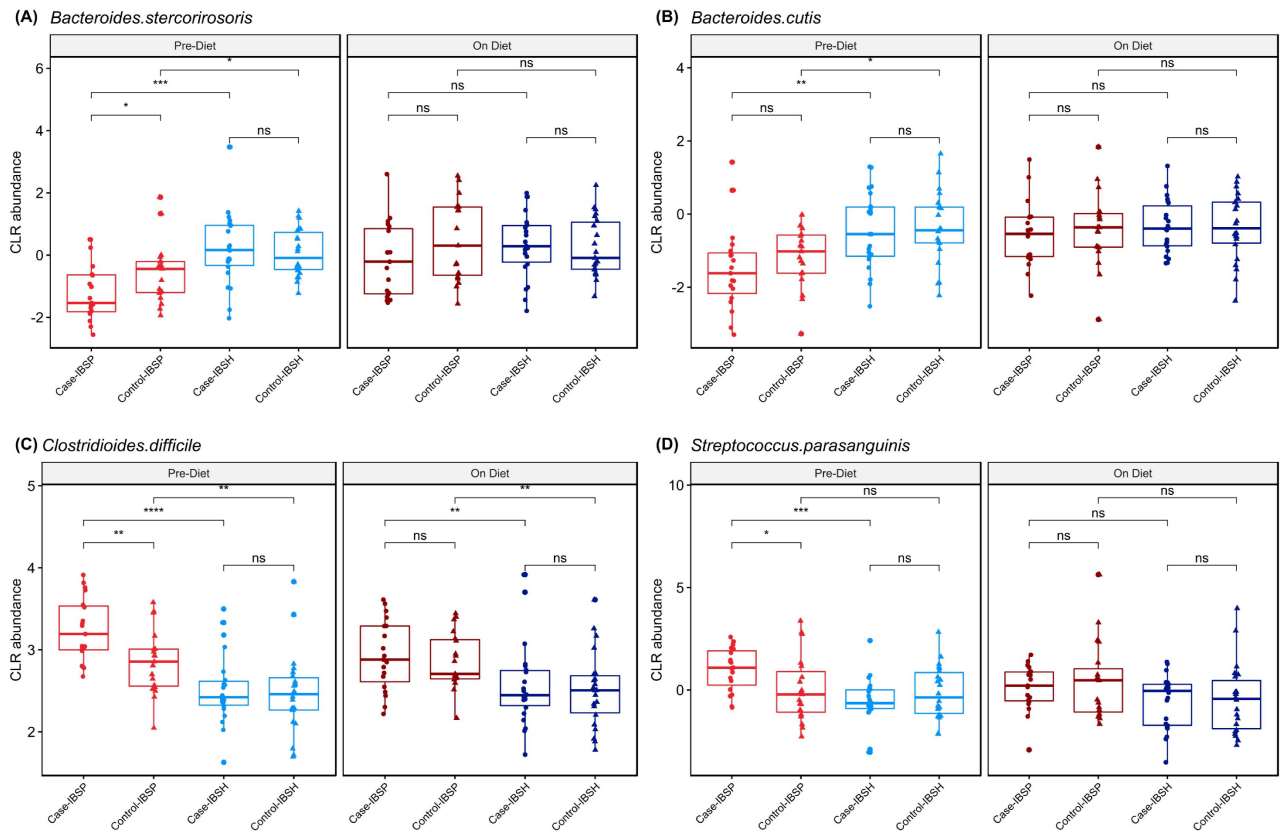

Supplement: gutjnl-2021-325177supp011_data_supplement.pdf [file gutjnl-2021-325177supp011_data_supplement.pdf]

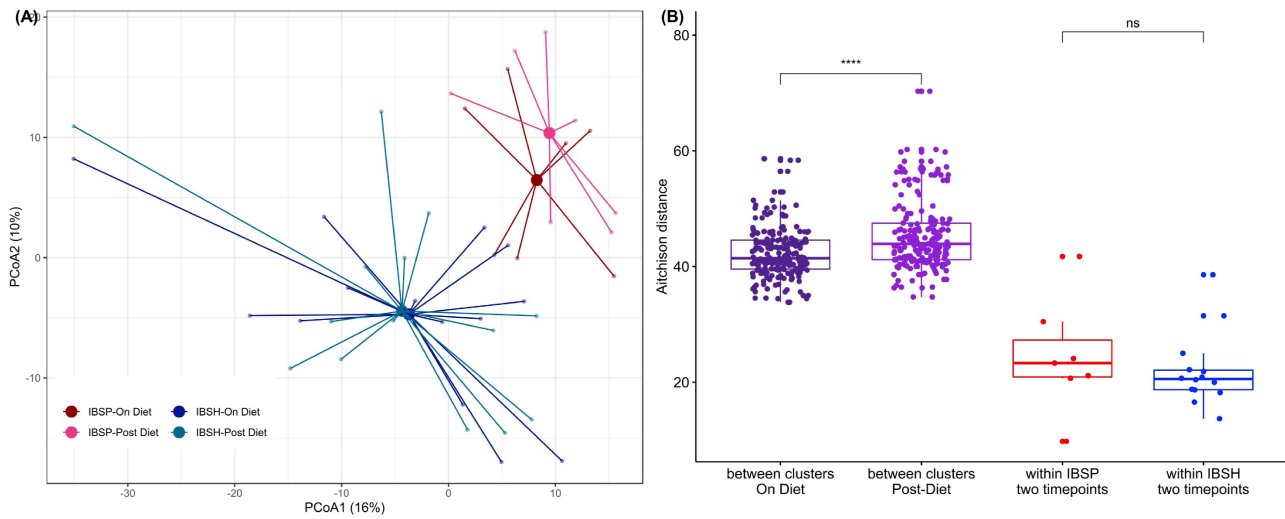

Supplement: gutjnl-2021-325177supp012_data_supplement.pdf [file gutjnl-2021-325177supp012_data_supplement.pdf]

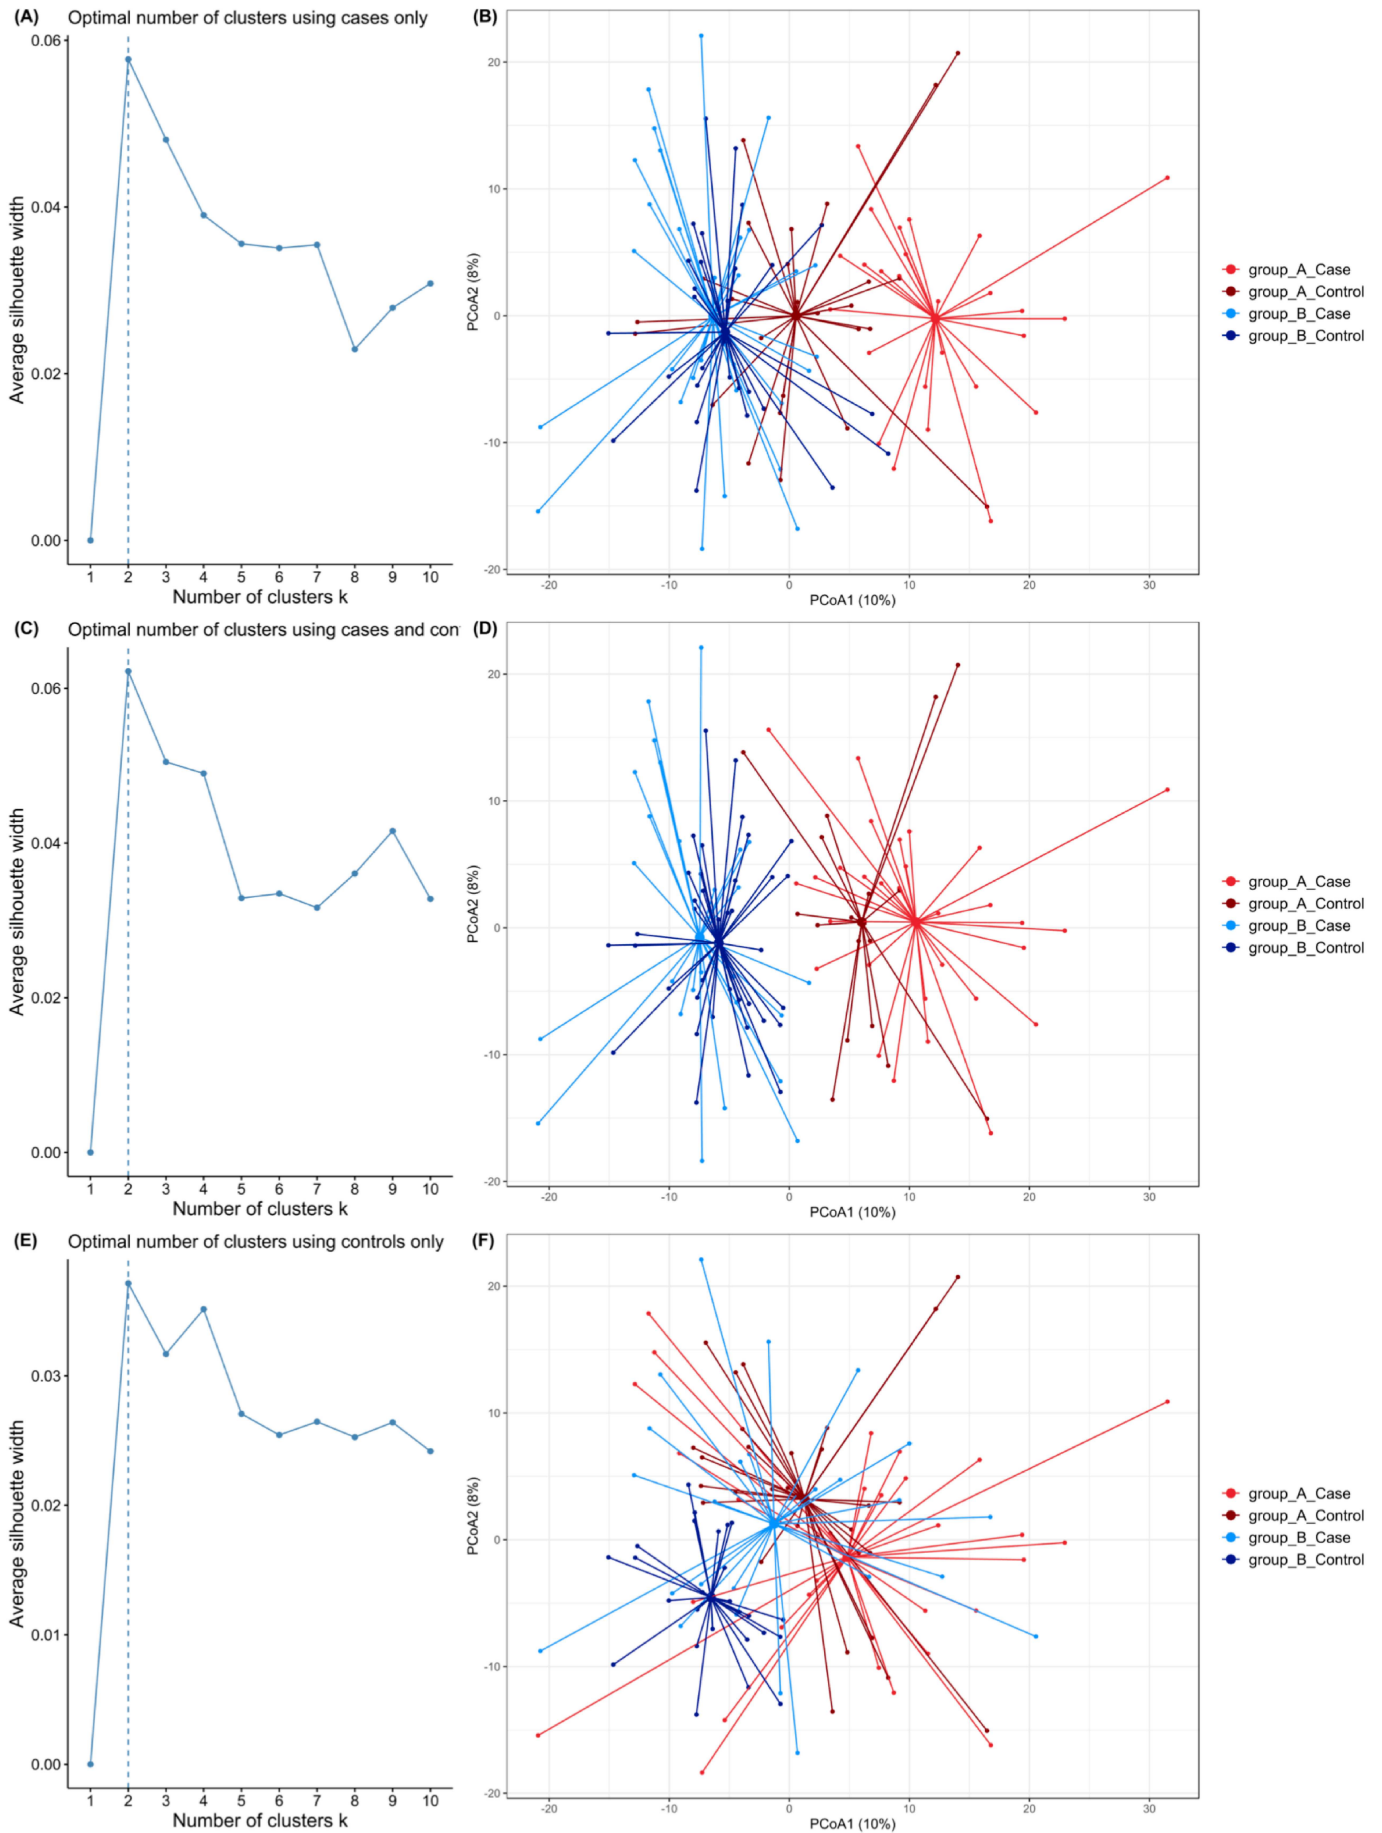

Supplement: gutjnl-2021-325177supp003_data_supplement.pdf [file gutjnl-2021-325177supp003_data_supplement.pdf]

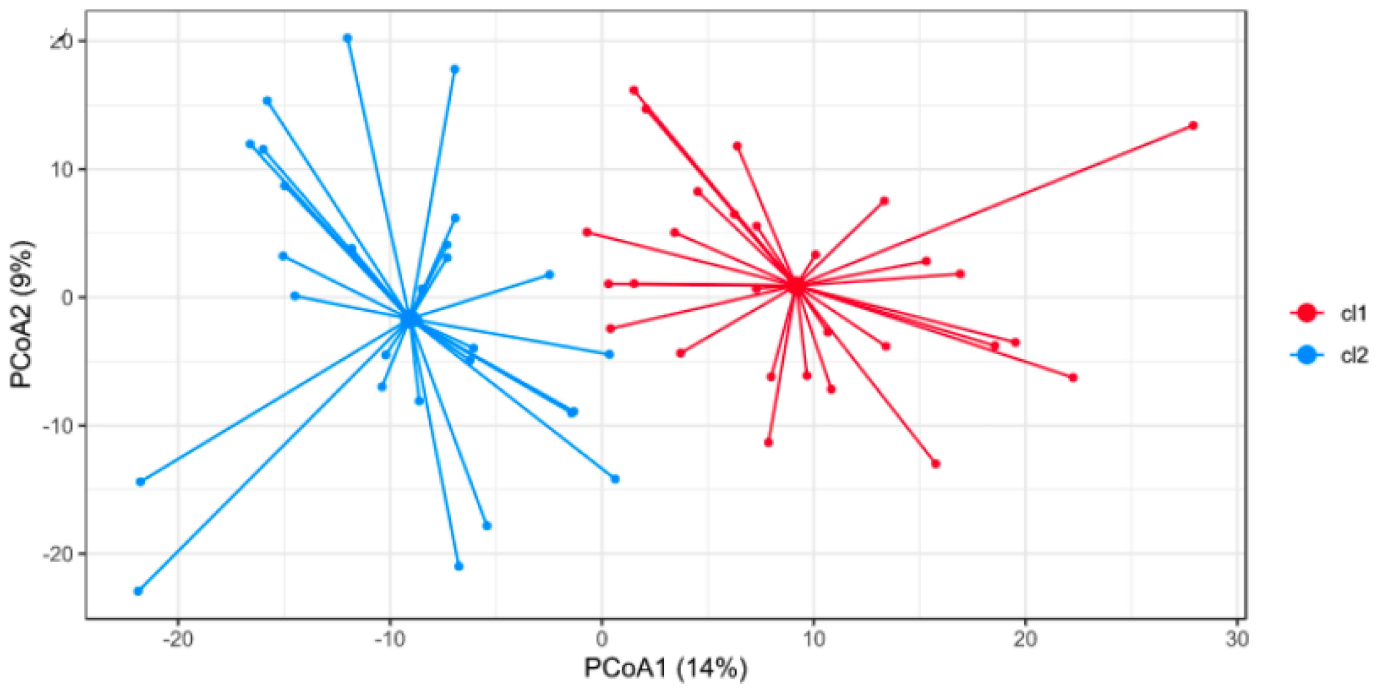

Supplement: gutjnl-2021-325177supp004_data_supplement.pdf [file gutjnl-2021-325177supp004_data_supplement.pdf]

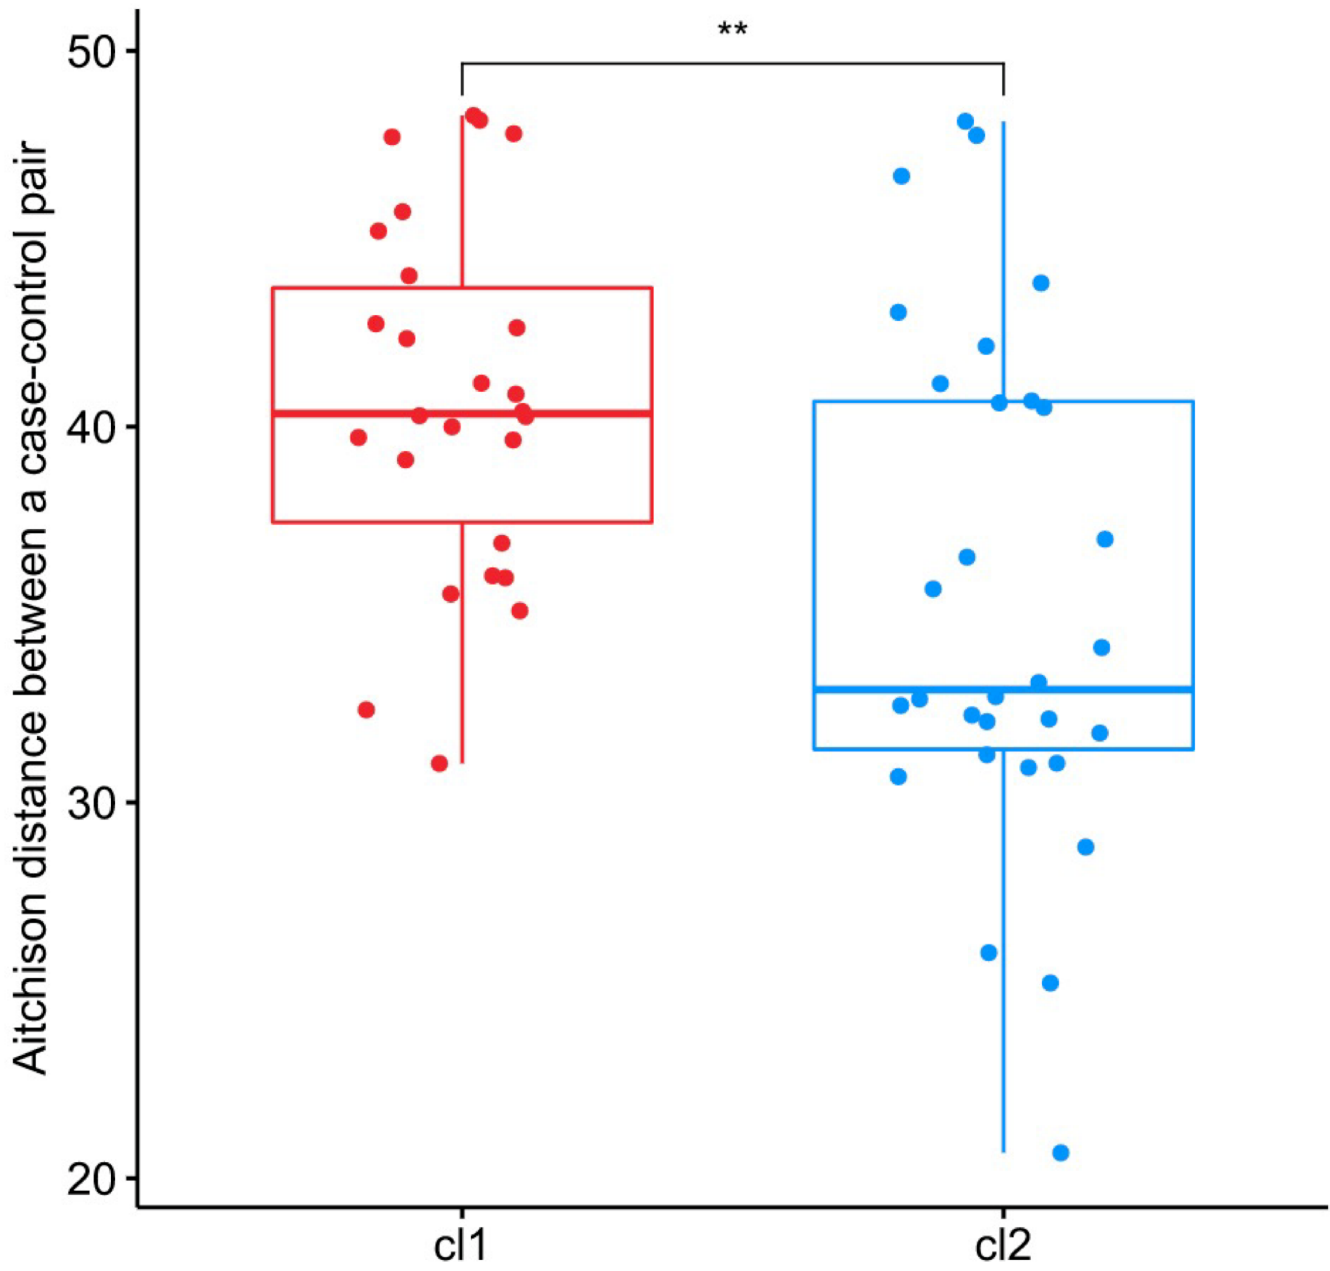

Supplement: gutjnl-2021-325177supp005_data_supplement.pdf [file gutjnl-2021-325177supp005_data_supplement.pdf]

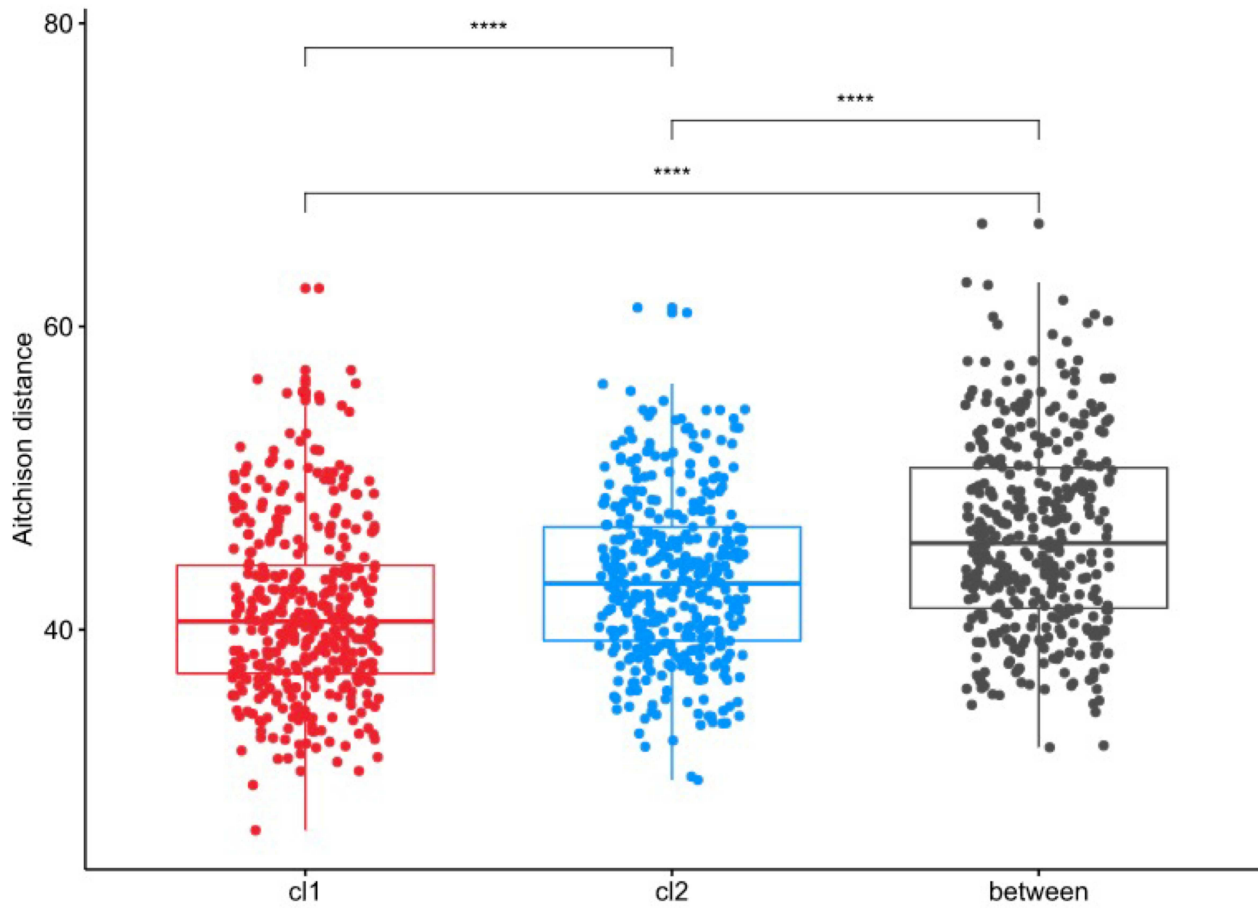

Supplement: gutjnl-2021-325177supp006_data_supplement.pdf [file gutjnl-2021-325177supp006_data_supplement.pdf]

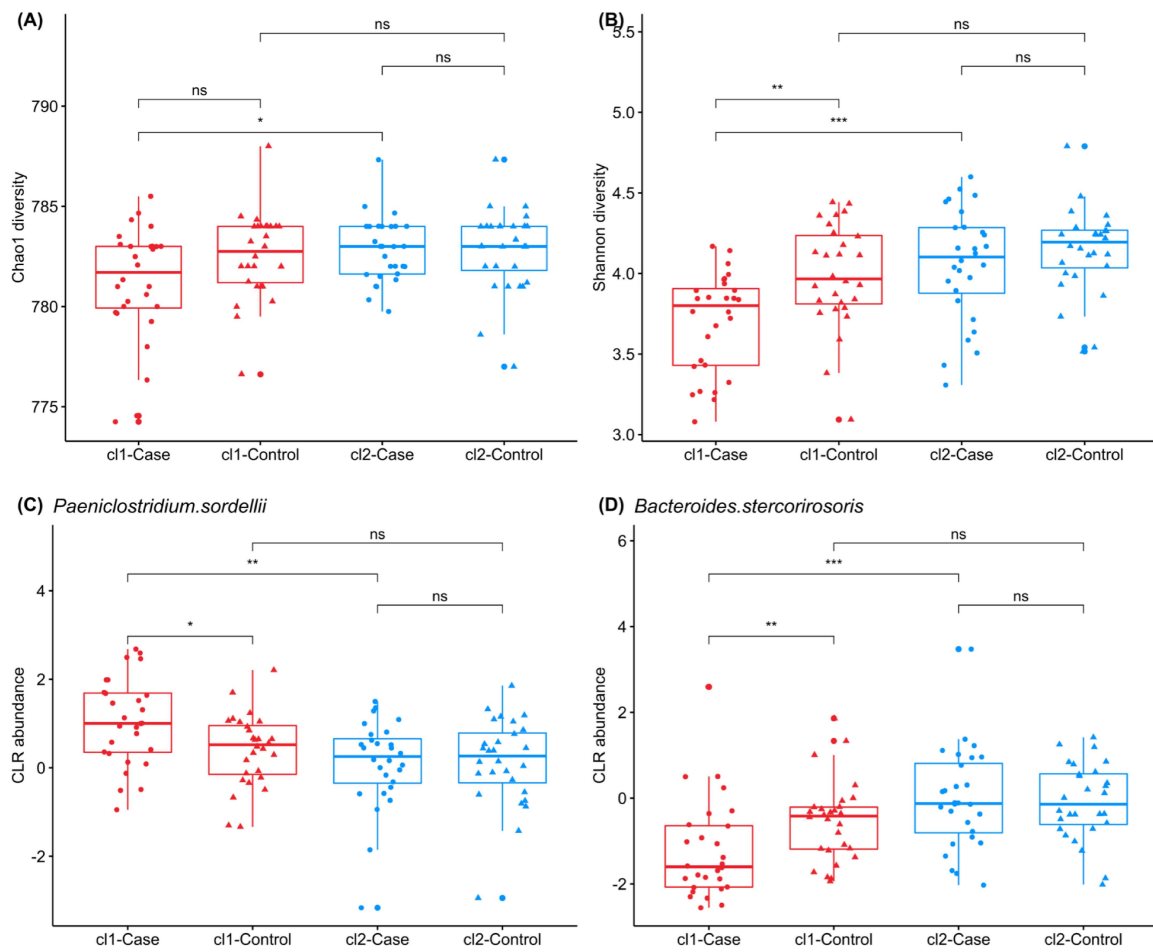

Supplement: gutjnl-2021-325177supp007_data_supplement.pdf [file gutjnl-2021-325177supp007_data_supplement.pdf]

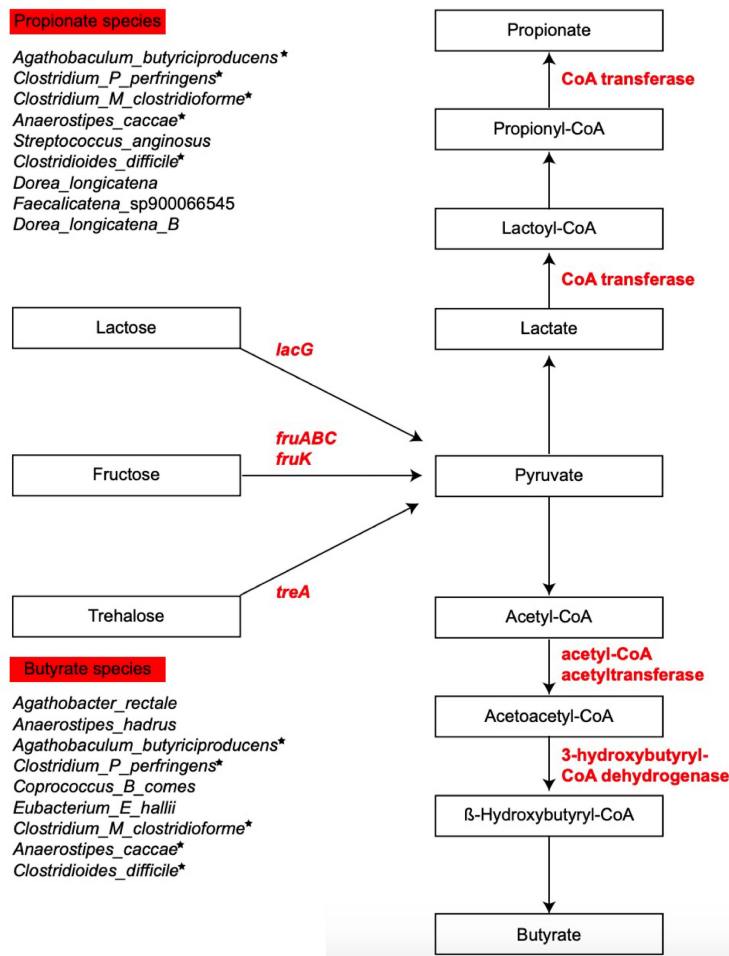

Supplement: gutjnl-2021-325177supp009_data_supplement.pdf [file gutjnl-2021-325177supp009_data_supplement.pdf]

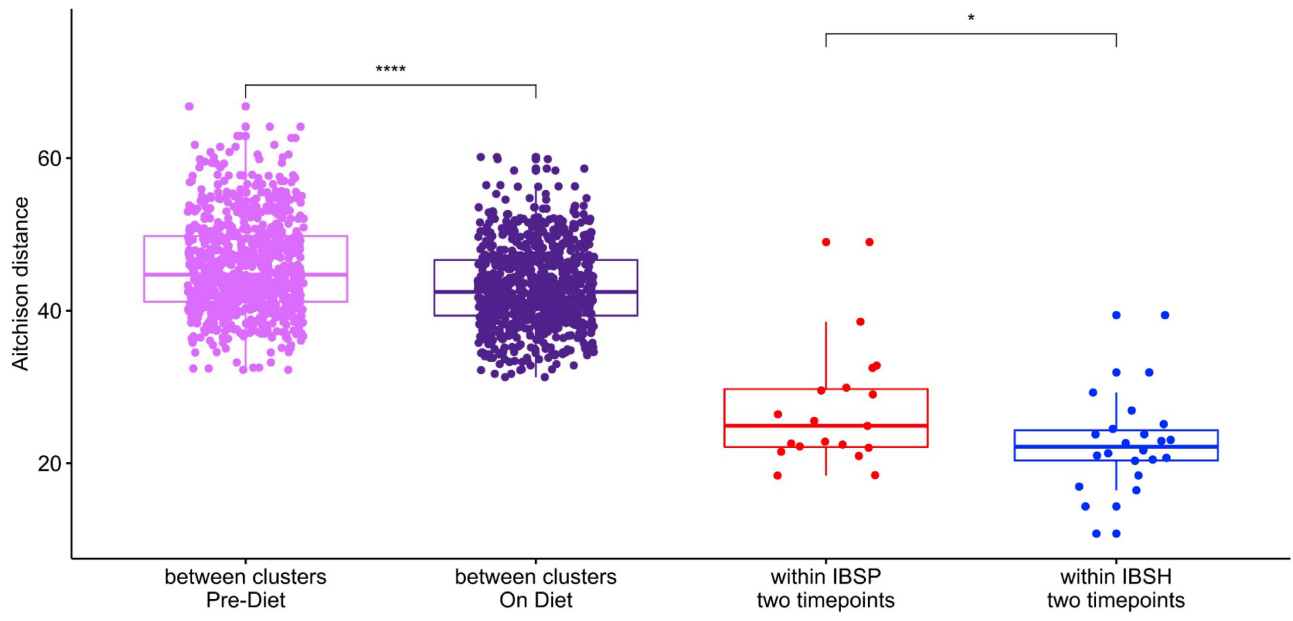

Supplement: gutjnl-2021-325177supp010_data_supplement.pdf [file gutjnl-2021-325177supp010_data_supplement.pdf]

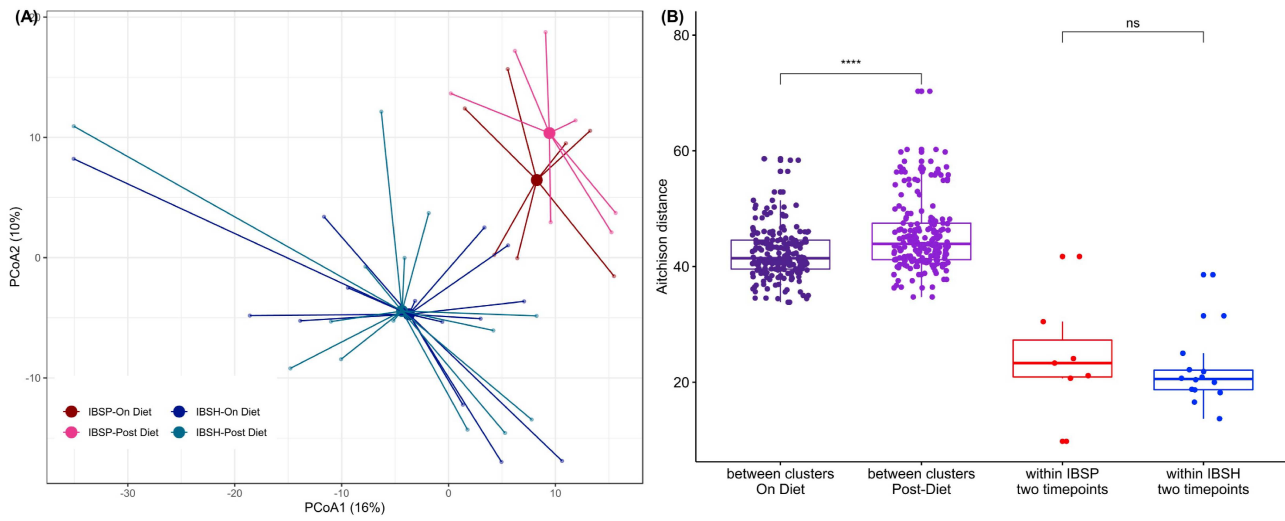

Supplement: gutjnl-2021-325177supp012_data_supplement.pdf [file gutjnl-2021-325177supp012_data_supplement.pdf]

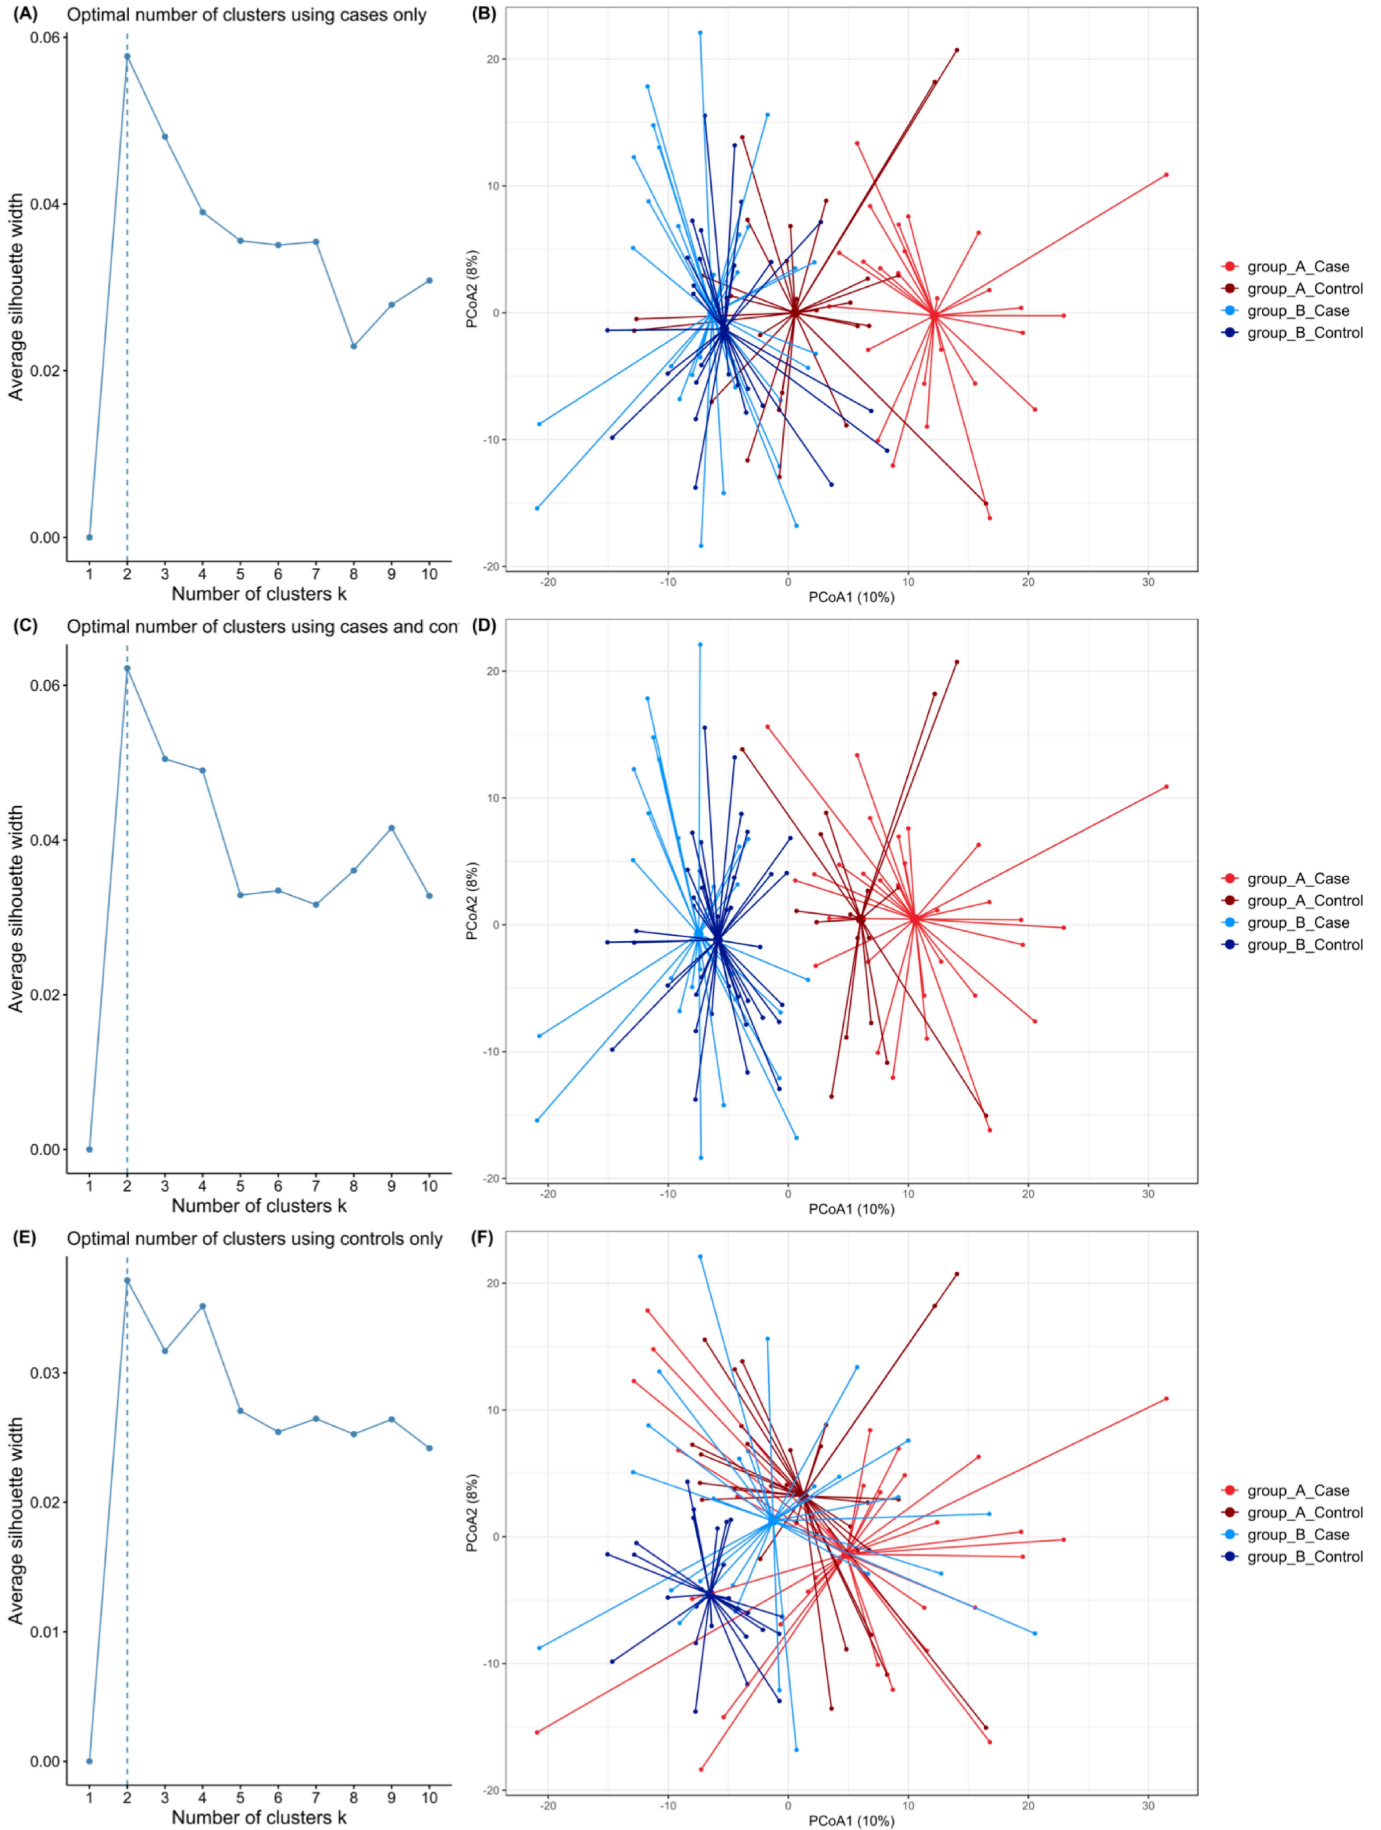

Supplement: gutjnl-2021-325177supp003_data_supplement.pdf [file gutjnl-2021-325177supp003_data_supplement.pdf]

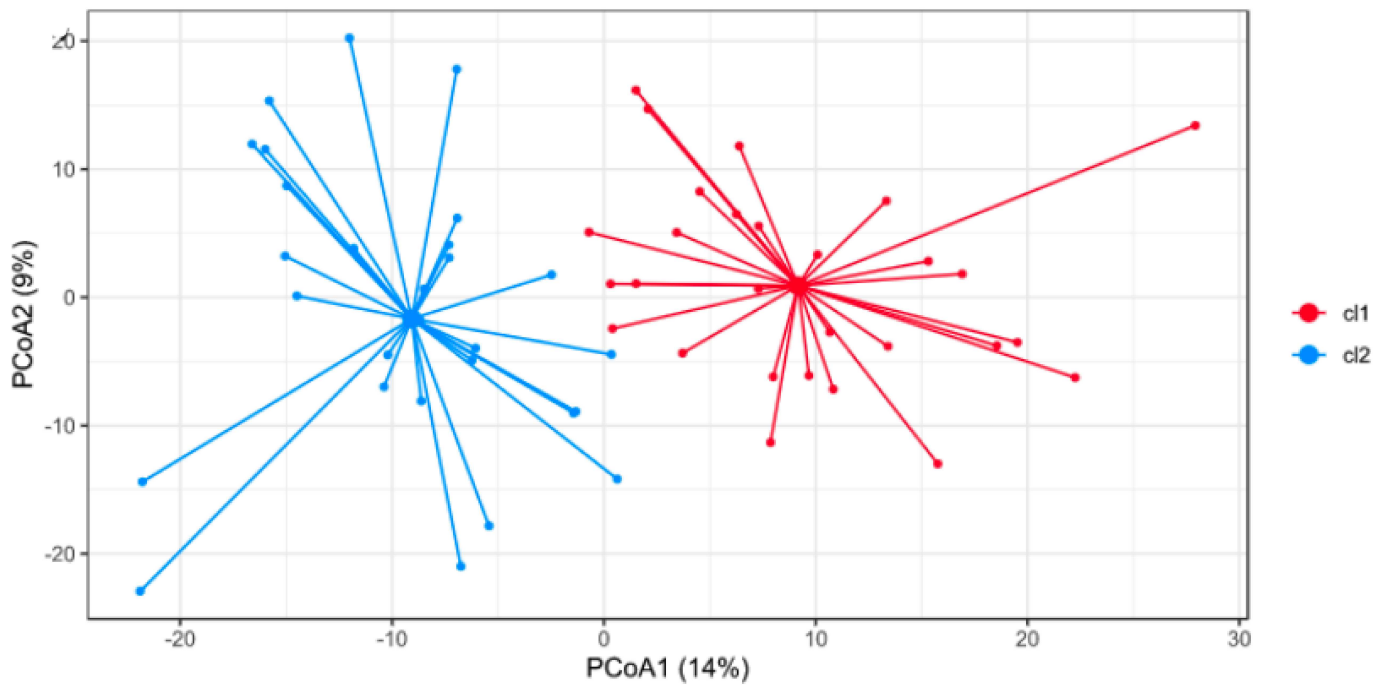

Supplement: gutjnl-2021-325177supp004_data_supplement.pdf [file gutjnl-2021-325177supp004_data_supplement.pdf]

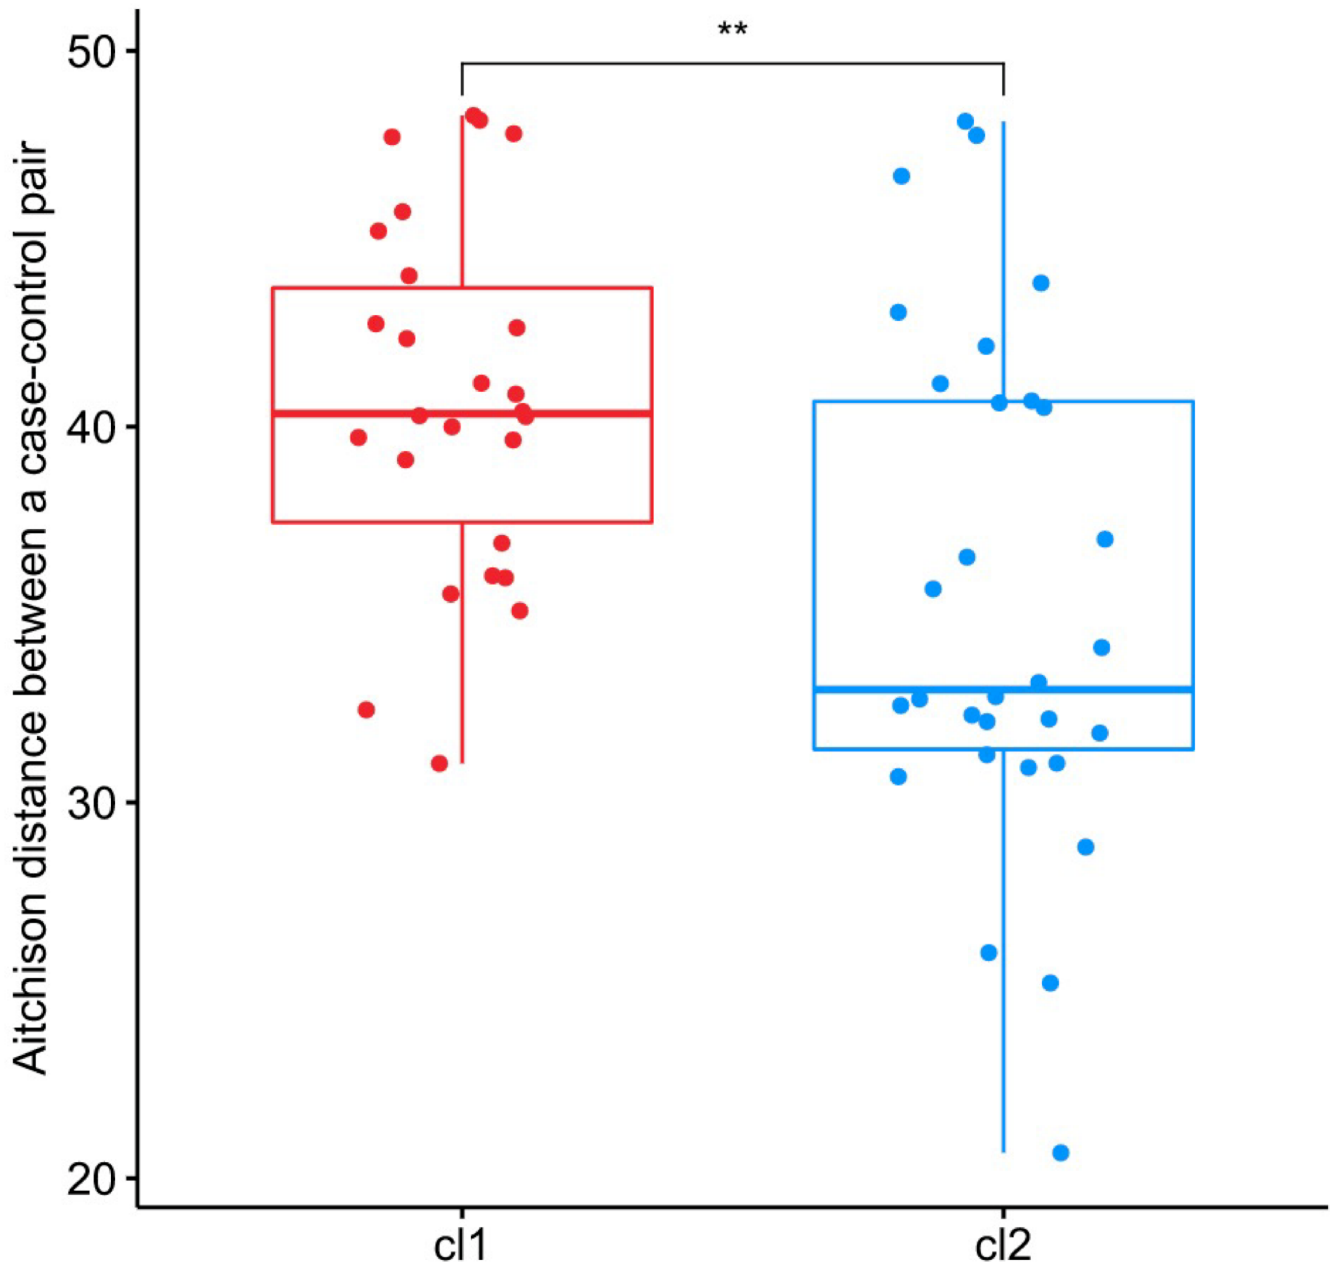

Supplement: gutjnl-2021-325177supp005_data_supplement.pdf [file gutjnl-2021-325177supp005_data_supplement.pdf]

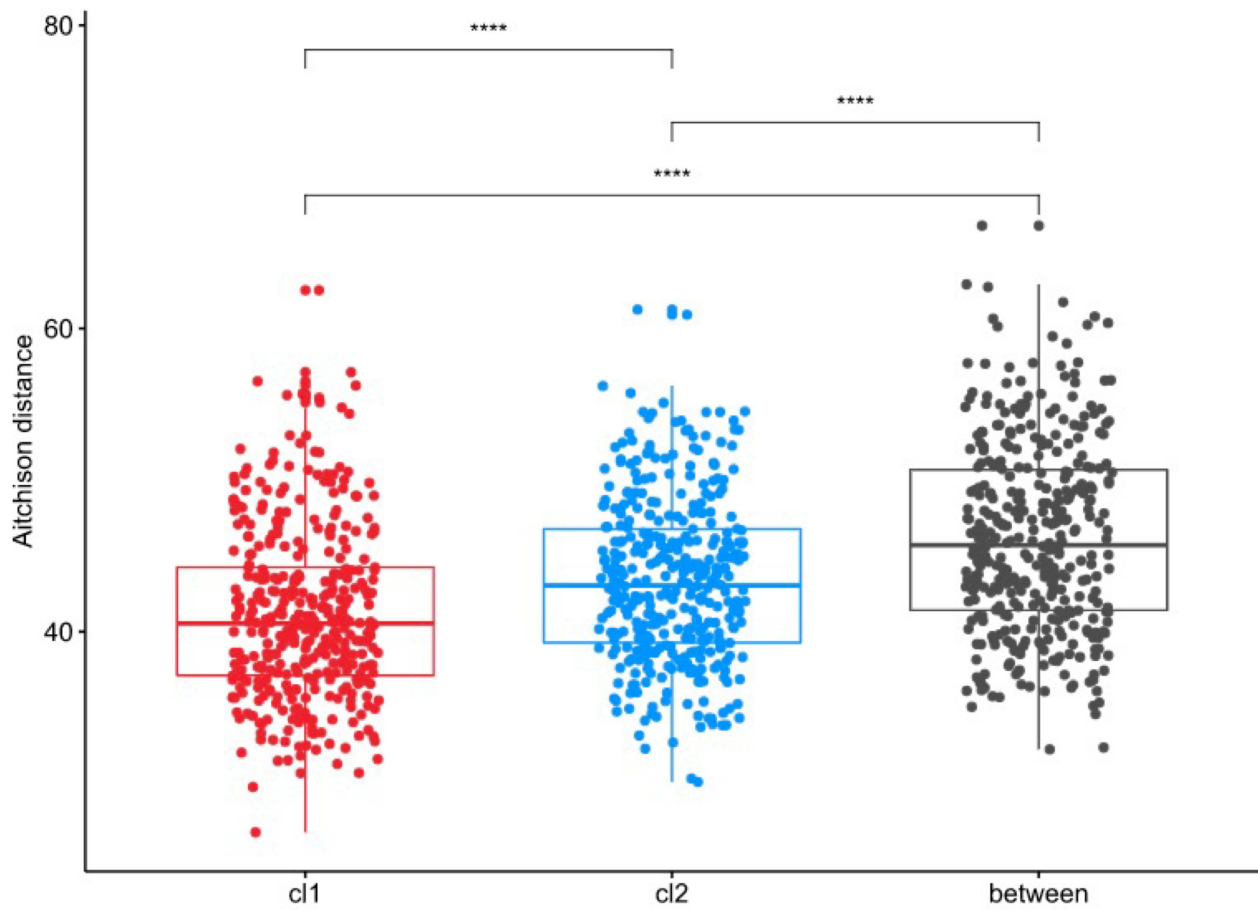

Supplement: gutjnl-2021-325177supp006_data_supplement.pdf [file gutjnl-2021-325177supp006_data_supplement.pdf]

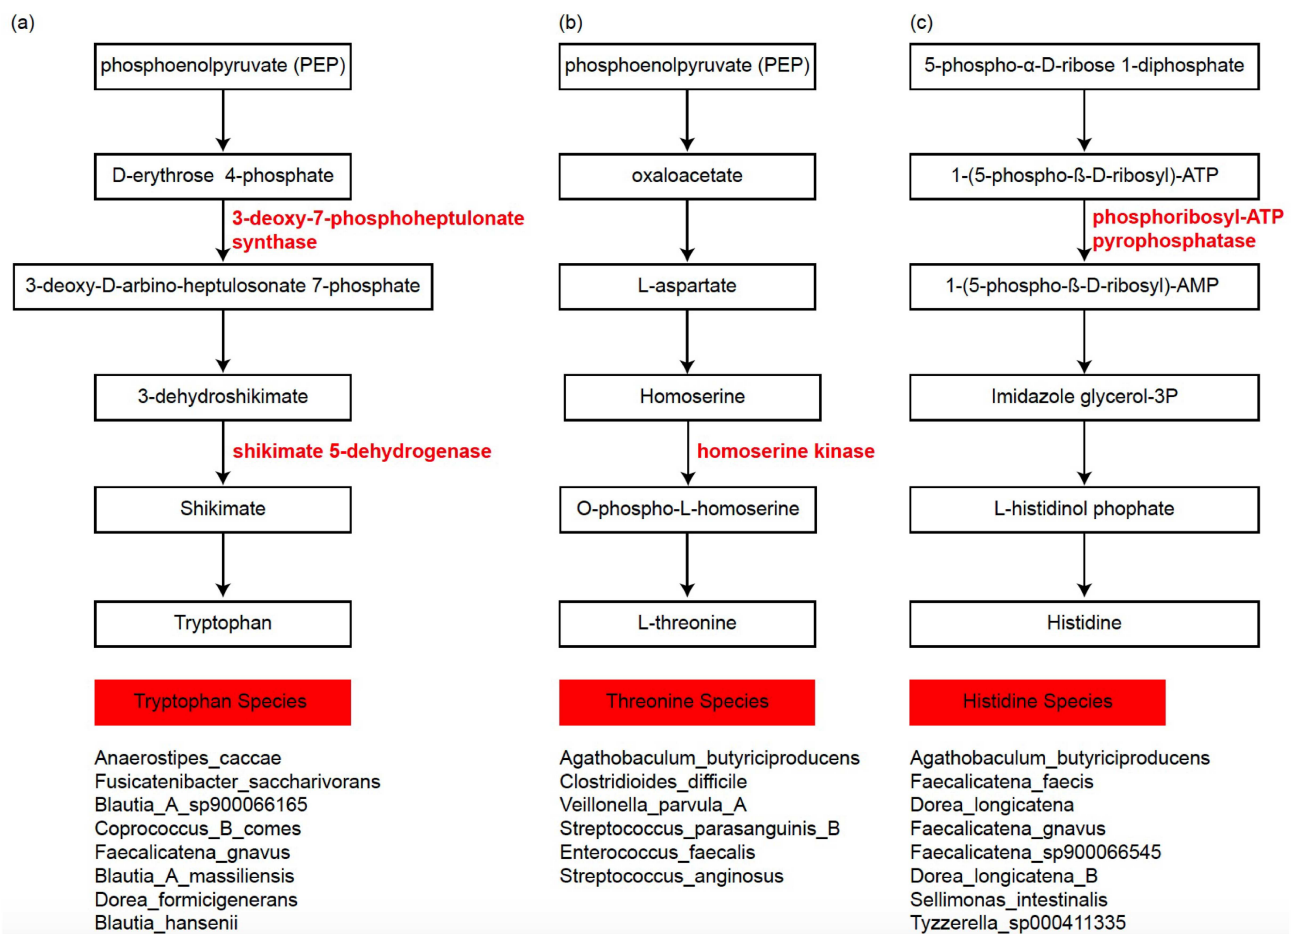

Supplement: gutjnl-2021-325177supp008_data_supplement.pdf [file gutjnl-2021-325177supp008_data_supplement.pdf]



Supplement: gutjnl-2021-325177supp009_data_supplement.pdf [file gutjnl-2021-325177supp009_data_supplement.pdf]

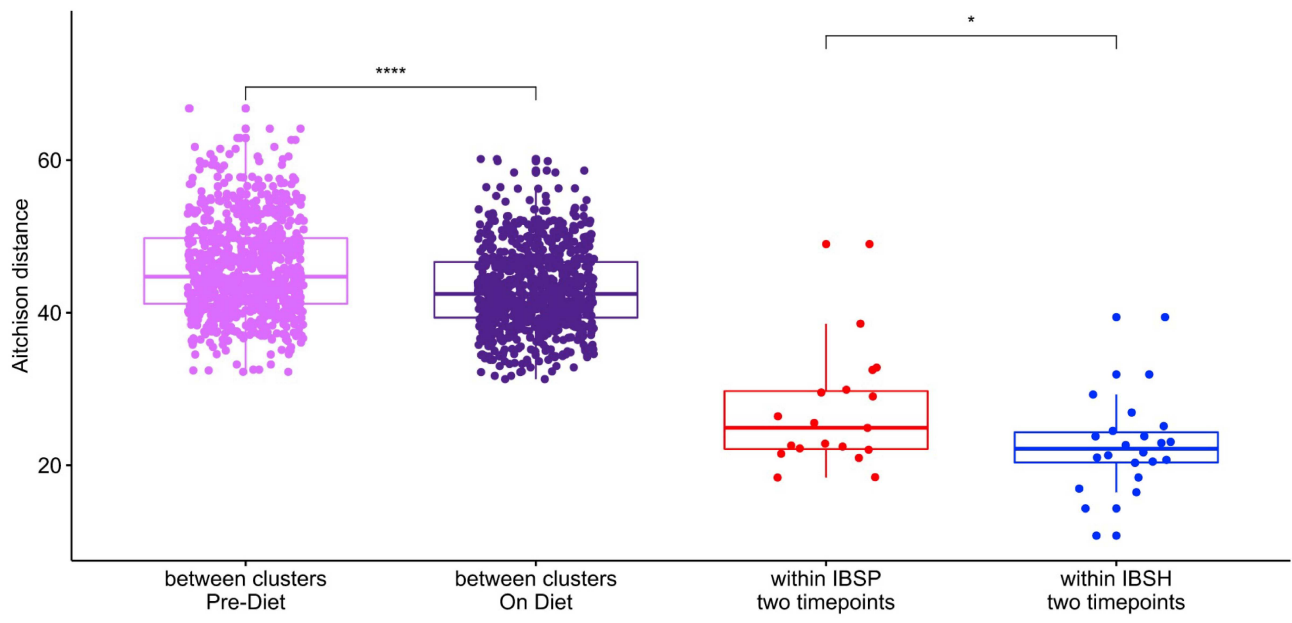

Supplement: gutjnl-2021-325177supp010_data_supplement.pdf [file gutjnl-2021-325177supp010_data_supplement.pdf]
